# Supplementary material
Source: PubMed Central journal article supplement (PMC3271769)
Supplement: supp_pp.111.187666_187666Supp_figuresrev.pdf [file supp_pp.111.187666_187666Supp_figuresrev.pdf]

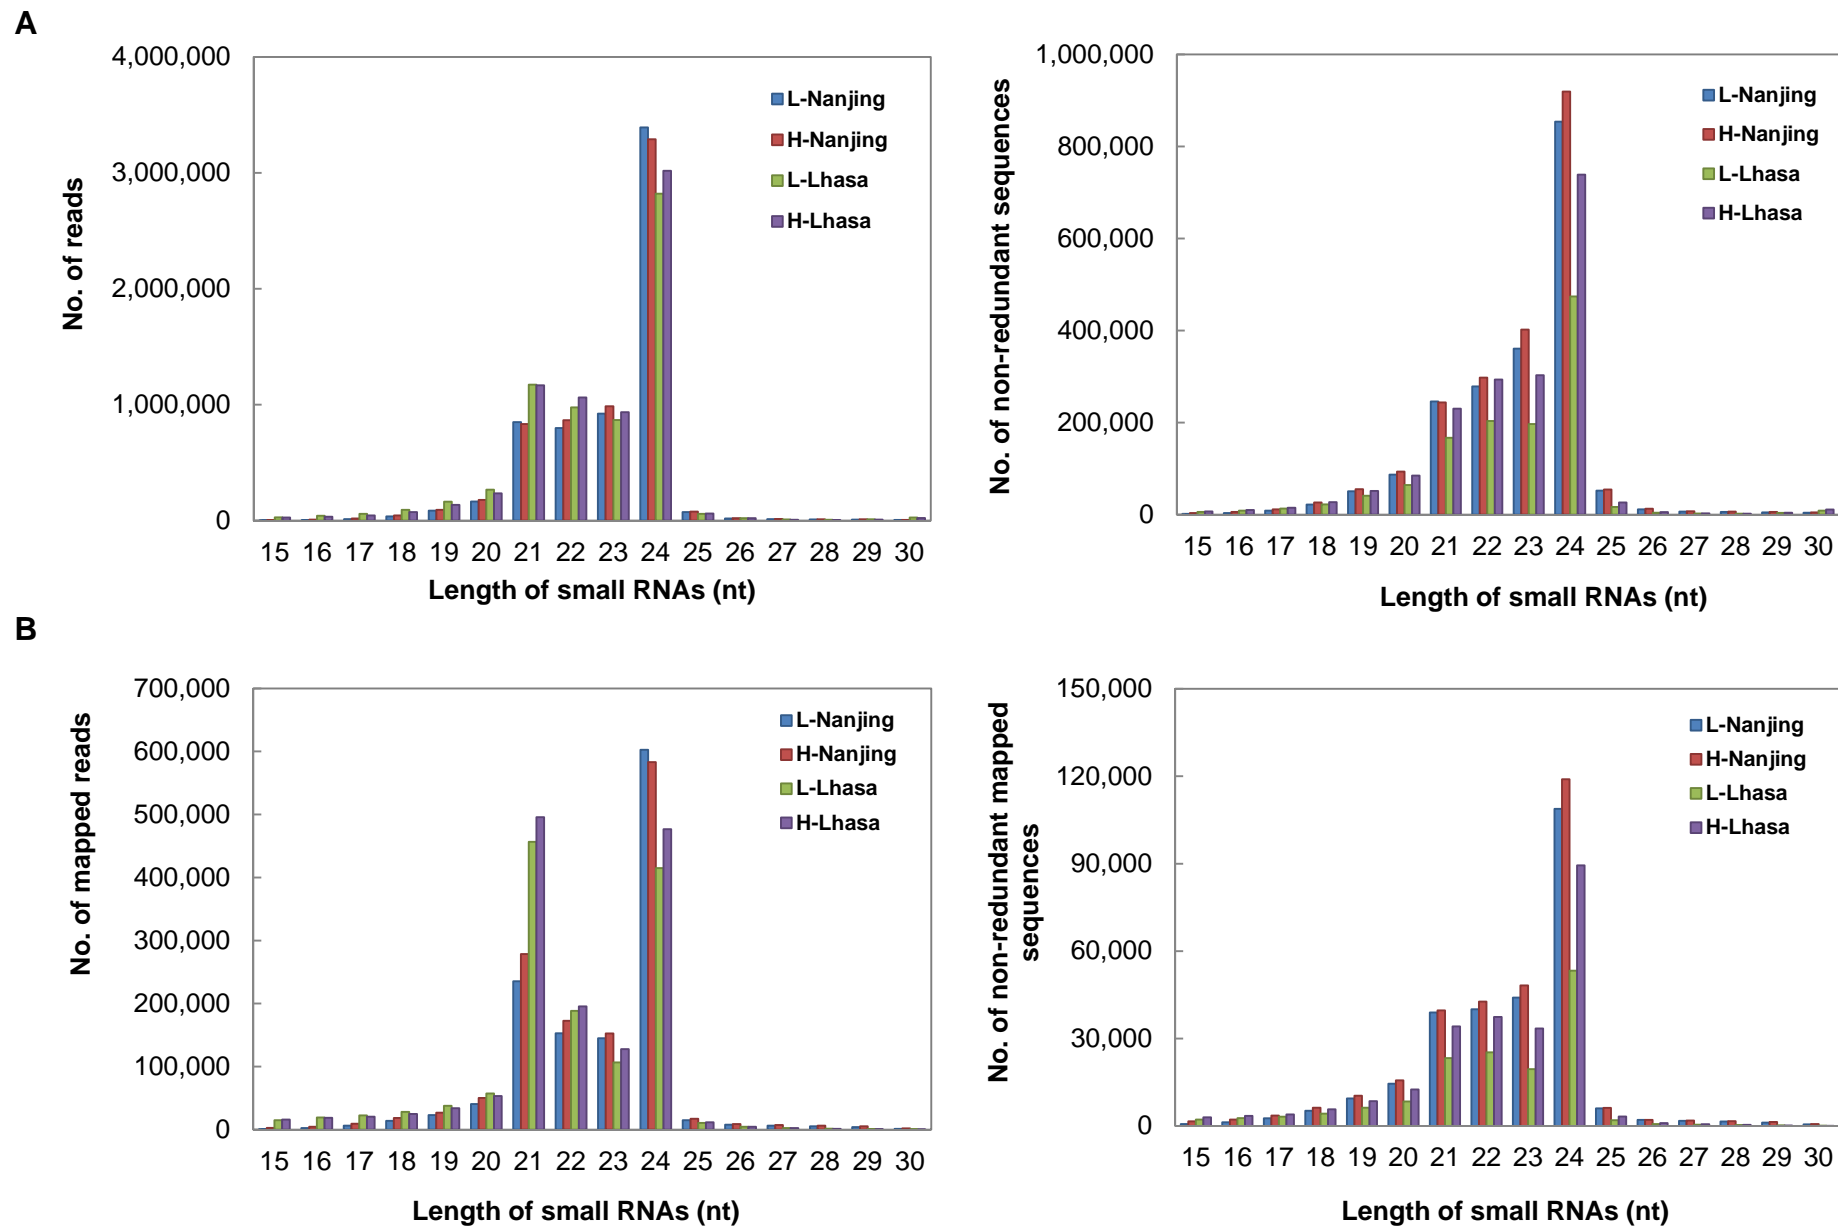

**Supplemental Figure S1.** Size distribution of small RNAs. A, Size distribution of total sequenced reads and non-redundant sequences; B, Size distribution of total sequenced reads and non-redundant sequences mapped to the *Brassica* BAC clones.

**A**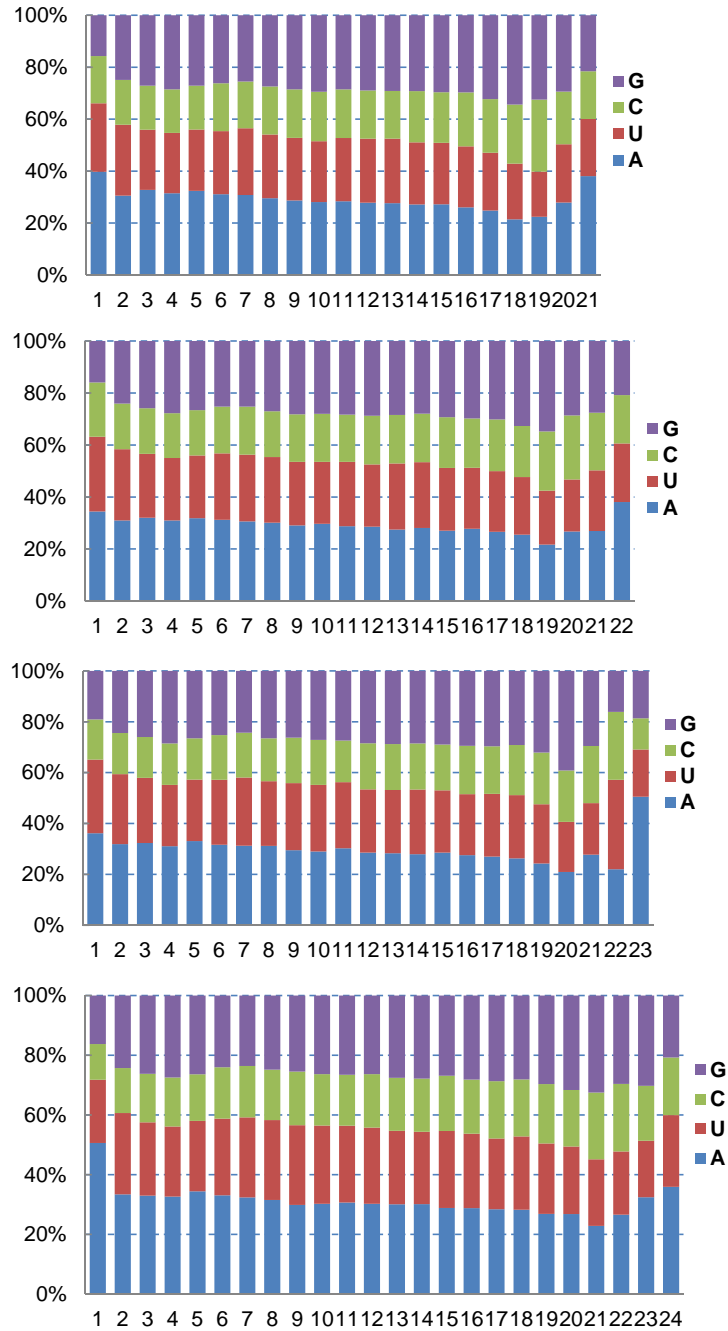**B**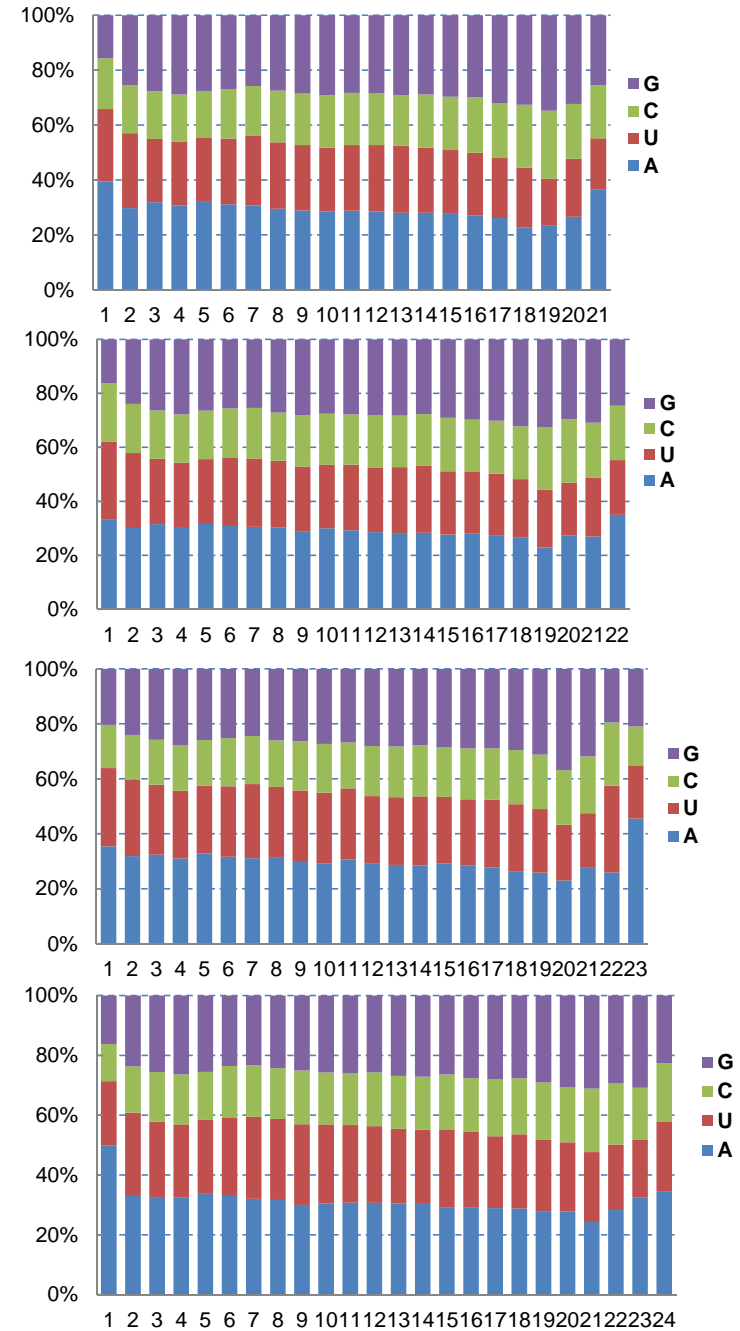

**Supplemental Figure S2.** Nucleotide preferences at each position of small RNAs. A, Nucleotide preferences of the total sequenced 21-nt, 22-nt, 23-nt, and 24-nt non-redundant sequences. B, Nucleotide preferences of the 21-nt, 22-nt, 23-nt, and 24-nt non-redundant sequences mapped to the *Brassica* BAC clones.

**A**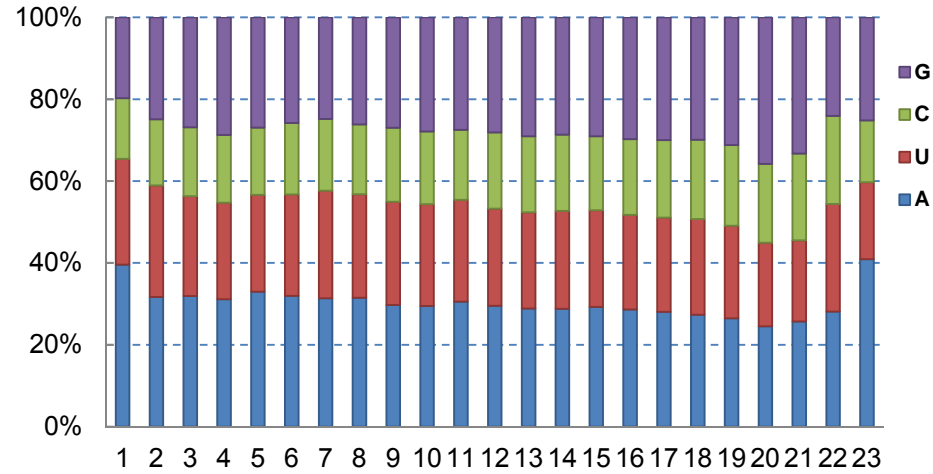**B**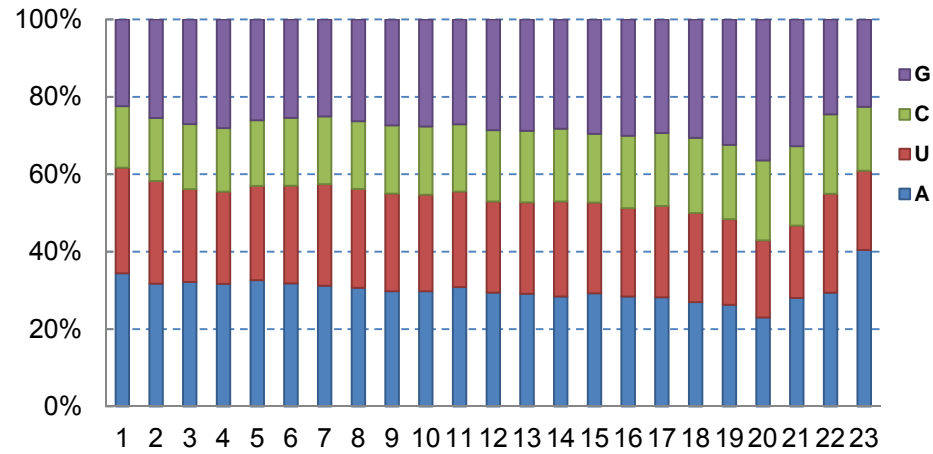

**Supplemental Figure S3.** Nucleotide preference at each position of the 24-nt dependent 23-nt small RNAs. A, Nucleotide preference of 23-nt small RNAs with identical 5' ends to the 24-nt ones. B, Nucleotide preference of 23-nt small RNAs with identical 3' ends to the 24-nt ones.

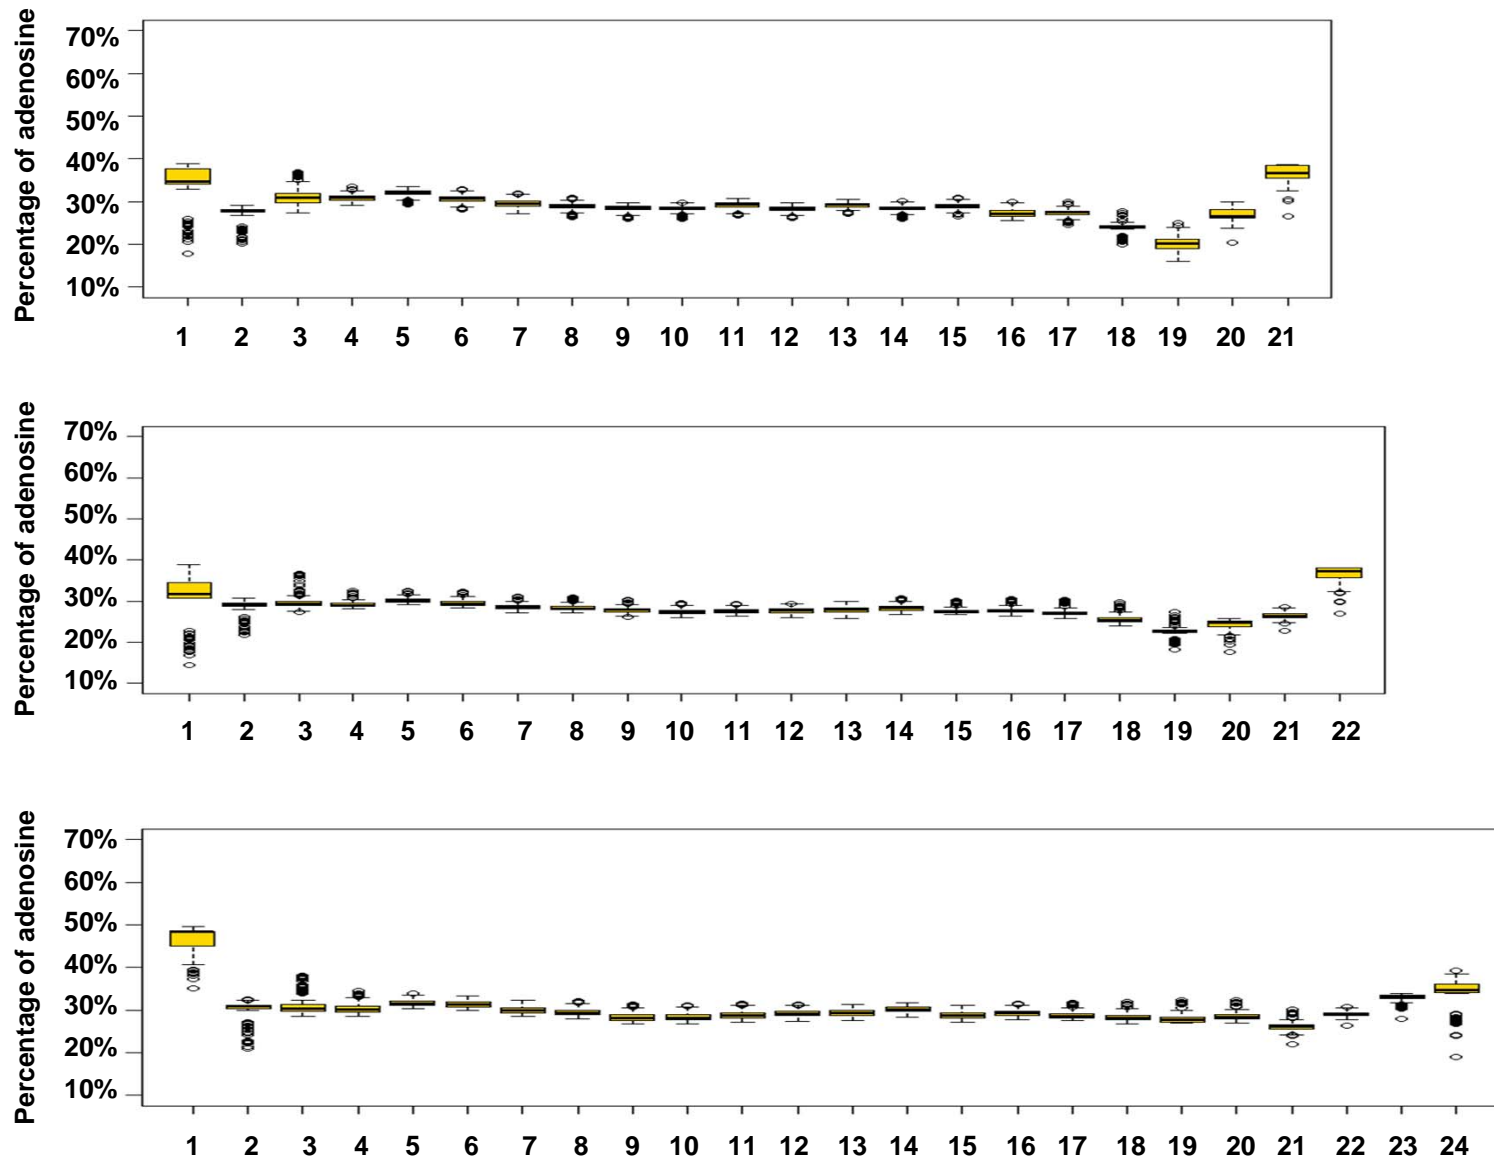

**Supplemental Figure S4.** Percentage of adenosine at each position of 21-nt, 22-nt, and 24-nt small RNAs of the 162 *Arabidopsis* small RNA deep sequencing data sets deposited in the NCBI GEO database.

**Supplemental Figure S5.** Secondary structures of the *B.napus* miRNA candidate precursors, and the expression and location of small RNAs mapped to these precursors. Sequences of miRNA candidates are labeled in red, and sequences of putative miRNA\*s are labeled in green.

#####  
#####

Bna-miR156b

```

Bna-miR156d_FP017265_-117824_117933      CGCAAAGAAACUGACAGAAGAGAGUGAGCACAAAGGCACUUUGCAUGUUGCAUGCAUUUGCUUCUUGCGUGCUCACUGUCUUAUCUGUCAGGUUCCGGCACCGAAU
Bn. sRNA3246342_1_0_0_0                    ..... GAAACUGACAGAAGAGAGUGAGCA .....
Bn. sRNA155032_0_1_0_0                    ..... AACUGACAGAAGAGAGUGAGC .....
Bn. sRNA155033_0_1_0_0                    ..... AACUGACAGAAGAGAGUGAGCA .....
Bn. sRNA155034_0_1_0_0                    ..... AACUGACAGAAGAGAGUGAGCAC .....
Bn. sRNA398947_0_1_0_0                    ..... AACUGACAGAAGAGAGUGAGCA .....
Bn. sRNA398948_1_1_0_0                    ..... AACUGACAGAAGAGAGUGAGCAC .....
Bn. sRNA3102851_4_13_6_7                  ..... CUGACAGAAGAGAGUGAGCAC .....
Bn. sRNA4873314_0_0_3_0                    ..... UGACAGAAGAGAGUG .....
Bn. sRNA4873315_0_4_3_2                    ..... UGACAGAAGAGAGUGA .....
Bn. sRNA4873323_2_9_14_2                   ..... UGACAGAAGAGAGUGAGC .....
Bn. sRNA4873324_11_12_26_14                ..... UGACAGAAGAGAGUGAGCA .....
Bn. sRNA4873327_1717_5450_4481_4194       ..... UGACAGAAGAGAGUGAGCAC .....
Bn. sRNA4873328_15_23_11_22                ..... UGACAGAAGAGAGUGAGCACA .....
Bn. sRNA3365278_45_109_49_30                ..... GACAGAAGAGAGUGAGCAC .....
Bn. sRNA3365279_0_1_0_0                    ..... GACAGAAGAGAGUGAGCACA .....
Bn. sRNA854619_1_15_9_3                    ..... ACAGAAGAGAGUGAGCAC .....
Bn. sRNA854620_0_0_0_2                     ..... ACAGAAGAGAGUGAGCACA .....
Bn. sRNA2520707_0_0_3_0                    ..... CAGAAGAGAGUGAGCAC .....
Bn. sRNA4989854_1_0_0_0                    ..... UGCUCACUCUCUUAUCUGUCAGGU .....

```

```

C----- AAA  A      - -      A ---|   CUU  GU
      GC  GAA CUGACAGA AGAG AGUGAGCAC CAA  AGGCA  UGCAU  \
      CG  CUU GACUGUCU UCUC UGACUCGUG GUU  UUCGU  ACGUA  U
UUAGCCA GC-  G      A  G      C  CUC^  UU-  GC

```

miRNA: Bn. sRNA4873327\_1717\_5450\_4481\_4194  
miRNA\*: Bn. sRNA4989854\_1\_0\_0\_0

Bna-miR156e

```

Bna-miR156e_AC189375_+125566_125684      GAAUUGCAACAGAGAAAACUGACAGAAGAGAGUGAGCACUUGCAAGGCACUUUAUGUGUCAUAACUUUGCGUGUGCGUGCUCACCCUCUCUUUCUGUCAGUUGCCUGACUUCUCGCUU
Bn. sRNA155032_0_1_0_0                    ..... AACUGACAGAAGAGAGUGAGC .....
Bn. sRNA155033_0_1_0_0                    ..... AACUGACAGAAGAGAGUGAGCA .....
Bn. sRNA155034_0_1_0_0                    ..... AACUGACAGAAGAGAGUGAGCAC .....
Bn. sRNA398947_0_1_0_0                    ..... AACUGACAGAAGAGAGUGAGCA .....
Bn. sRNA398948_1_1_0_0                    ..... AACUGACAGAAGAGAGUGAGCAC .....
Bn. sRNA1075625_1_0_0_0                    ..... ACUGACAGAAGAGAGUGAGCACU .....
Bn. sRNA3102851_4_13_6_7                  ..... CUGACAGAAGAGAGUGAGCAC .....
Bn. sRNA4873314_0_0_3_0                    ..... UGACAGAAGAGAGUG .....
Bn. sRNA4873315_0_4_3_2                    ..... UGACAGAAGAGAGUGA .....
Bn. sRNA4873323_2_9_14_2                   ..... UGACAGAAGAGAGUGAGC .....
Bn. sRNA4873324_11_12_26_14                ..... UGACAGAAGAGAGUGAGCA .....
Bn. sRNA4873327_1717_5450_4481_4194       ..... UGACAGAAGAGAGUGAGCAC .....
Bn. sRNA4873333_93_68_55_34                ..... UGACAGAAGAGAGUGAGCACU .....
Bn. sRNA4873337_0_4_6_2                     ..... UGACAGAAGAGAGUGAGCACUU .....
Bn. sRNA3365278_45_109_49_30                ..... GACAGAAGAGAGUGAGCAC .....
Bn. sRNA3365280_0_1_0_2                     ..... GACAGAAGAGAGUGAGCACU .....
Bn. sRNA854619_1_15_9_3                    ..... ACAGAAGAGAGUGAGCAC .....
Bn. sRNA854621_1_0_0_0                    ..... ACAGAAGAGAGUGAGCACUU .....
Bn. sRNA854622_2_6_0_0                     ..... ACAGAAGAGAGUGAGCACUUG .....
Bn. sRNA854623_0_1_0_0                    ..... ACAGAAGAGAGUGAGCACUUGC .....
Bn. sRNA2520707_0_0_3_0                    ..... CAGAAGAGAGUGAGCAC .....
Bn. sRNA4989791_1_1_0_8                    ..... UGCUCACCCUCUCUUUCUGUCAGU .....
Bn. sRNA3733973_0_1_0_0                    ..... GCUCACCCUCUCUUUCUGUCAG .....
Bn. sRNA3733974_1_3_0_2                    ..... GCUCACCCUCUCUUUCUGUCAGU .....
Bn. sRNA4553141_1_0_0_0                    ..... UCACCCUCUCUUUCUGUCAGU .....

```

```

GAAUUGCAACA ----- - -|   U  AG  CU  GU
      GAGAA      AACUGACAG AAGAGA GUGAGCAC UGCA  GCA  GUUAU  G
      CUCUU      UUGACUGUC UUCUCU CACUCGUG GUGU  CGU  CAAUA  U
UUCG----- CAGUCCG      U  C^   C  G-  UU  AC

```

miRNA: Bn. sRNA4873327\_1717\_5450\_4481\_4194  
miRNA\*: Bn. sRNA3733974\_1\_3\_0\_2

Bna-miR156f

Bna-miR156f\_AC232482\_-\_135085\_135194 CACACAGAAACUGACAGAAGAGAGAGAGCACA AAAAGUAAAUGCAUAUGUGCAUUUGCUUCUCUUGCGUGCUCACUGCUCUUUCUGUCAGAUUCCCGUGCUGAUCUC  
 Bn. sRNA3246342\_1\_0\_0\_0 ..... GAAACUGACAGAAGAGAGAGAGCA. ....  
 Bn. sRNA155032\_0\_1\_0\_0 ..... AAACUGACAGAAGAGAGAGAGC. ....  
 Bn. sRNA155033\_0\_1\_0\_0 ..... AAACUGACAGAAGAGAGAGAGCA. ....  
 Bn. sRNA155034\_0\_1\_0\_0 ..... AAACUGACAGAAGAGAGAGAGC. ....  
 Bn. sRNA398947\_0\_1\_0\_0 ..... AACUGACAGAAGAGAGAGAGCA. ....  
 Bn. sRNA398948\_1\_1\_0\_0 ..... AACUGACAGAAGAGAGAGAGC. ....  
 Bn. sRNA3102851\_4\_13\_6\_7 ..... CUGACAGAAGAGAGAGAGC. ....  
 Bn. sRNA4873314\_0\_0\_3\_0 ..... UGACAGAAGAGAGAG. ....  
 Bn. sRNA4873315\_0\_4\_3\_2 ..... UGACAGAAGAGAGAG. ....  
 Bn. sRNA4873323\_2\_9\_14\_2 ..... UGACAGAAGAGAGAGC. ....  
 Bn. sRNA4873324\_11\_12\_26\_14 ..... UGACAGAAGAGAGAGCA. ....  
 Bn. sRNA4873327\_1717\_5450\_4481\_4194 ..... UGACAGAAGAGAGAGAGC. ....  
 Bn. sRNA4873328\_15\_23\_11\_22 ..... UGACAGAAGAGAGAGAGCACA. ....  
 Bn. sRNA3365278\_45\_109\_49\_30 ..... GACAGAAGAGAGAGAGC. ....  
 Bn. sRNA3365279\_0\_1\_0\_0 ..... GACAGAAGAGAGAGAGCACA. ....  
 Bn. sRNA854619\_1\_15\_9\_3 ..... ACAGAAGAGAGAGAGAGC. ....  
 Bn. sRNA854620\_0\_0\_0\_2 ..... ACAGAAGAGAGAGAGCACA. ....  
 Bn. sRNA2520707\_0\_0\_3\_0 ..... CAGAAGAGAGAGAGC. ....  
 Bn. sRNA4989857\_0\_1\_0\_7 ..... UGCUCACUGCUCUUUCUGUCAGA. ....  
 Bn. sRNA3734124\_0\_0\_3\_2 ..... GCUCACUGCUCUUUCUGUCAGA. ....  
 Bn. sRNA3050266\_0\_0\_3\_0 ..... CUCACUGCUCUUUCUGUCAGA. ....

----- - A- A - - A ---| U UA  
 CA CAC GAA CUGACAG AAGAG AGUGAGCAC CAA AAGUAAA GCA \  
 GU GUG CUU GACUGUC UUCUC UCACUCGUG GUU UUCGUUUA CGU U  
 CUCUA C CC A U G C CUC^ - UG

miRNA: Bn. sRNA4873327\_1717\_5450\_4481\_4194  
 miRNA\*: Bn. sRNA3734124\_0\_0\_3\_2

#####  
 #####

Bna-miR156g

Bna-miR156g\_AC232473+\_6479\_6593 CGUUGAUAGUGUAGACAGAAGAUAGAGAGCAGAGAU GAUGAGAU GCAAUUUGGAGCAGCUUGUAUGCAUCGUACUCCUUUGUGCUCUCUAGUCUCUGUCAUCACUCGUUACUUG  
 Bn. sRNA5188510\_0\_1\_0\_0 ..... UGUUGACAGAAGAUAGAGAGC. ....  
 Bn. sRNA5188511\_0\_0\_3\_0 ..... UGUUGACAGAAGAUAGAGAGCACA. ....  
 Bn. sRNA5382125\_0\_2\_0\_0 ..... UUGACAGAAGAUAGA. ....  
 Bn. sRNA5382129\_1\_0\_0\_0 ..... UUGACAGAAGAUAGAGA. ....  
 Bn. sRNA5382133\_1\_1\_0\_0 ..... UUGACAGAAGAUAGAG. ....  
 Bn. sRNA5382139\_3\_9\_3\_2 ..... UUGACAGAAGAUAGAGAGC. ....  
 Bn. sRNA5382140\_6\_11\_0\_5 ..... UUGACAGAAGAUAGAGAGCA. ....  
 Bn. sRNA5382142\_1966\_4606\_835\_1757 ..... UUGACAGAAGAUAGAGAGC. ....  
 Bn. sRNA5382143\_0\_4\_0\_3 ..... UUGACAGAAGAUAGAGAGCACA. ....  
 Bn. sRNA4873384\_2\_2\_0\_0 ..... UGACAGAAGAUAGAGAGCA. ....  
 Bn. sRNA4873386\_203\_484\_6\_15 ..... UGACAGAAGAUAGAGAGC. ....  
 Bn. sRNA4873387\_7\_10\_0\_5 ..... UGACAGAAGAUAGAGAGCACA. ....  
 Bn. sRNA3365295\_35\_62\_3\_5 ..... GACAGAAGAUAGAGAGC. ....  
 Bn. sRNA3365296\_0\_2\_0\_0 ..... GACAGAAGAUAGAGAGCACA. ....  
 Bn. sRNA854685\_1\_0\_3\_0 ..... ACAGAAGAUAGAGAGC. ....  
 Bn. sRNA854686\_5\_12\_26\_96 ..... ACAGAAGAUAGAGAGCAGAGA. ....  
 Bn. sRNA3739255\_0\_0\_0\_2 ..... GCUCUCUAGUCUUCUGUCAUC. ....

CGU- - U - U UGA-| AUUU AG  
 UGAU AGUG UGACAGAAGA UAGAGAGCACAGA GA GAUGCA GG \  
 AUUG UCAC ACUGUCUUCU AUCUCUCGUGUUU CU CUACGU UC C  
 GUUC C U G C CAUG^ AUGU GA

miRNA: Bn. sRNA5382142\_1966\_4606\_835\_1757

miRNA\*: Bn. sRNA3739255\_0\_0\_2

#####  
#####

Bna-miR159

|                                 |                                                                                                                                                                               |
|---------------------------------|-------------------------------------------------------------------------------------------------------------------------------------------------------------------------------|
| Bna-miR159_CU695299_31427_31637 | AUUUCCGAGAACAAAGAGUGGGCCUUAUAGUCAAAGGAGUUAGCAGGUAAGAAAGGUGUAAGCUAUGAUCCAUAGCCUUAUCCUUAUUAUAAAGGAAUUGGUUAUAGGCUAUAUCCAGGAGCUUAAGUCCUUAUUGCUUUAUCUUCUUGGAUUGAGGGAGCUACAUCUUCUUC |
| Bn. sRNA1574936_0_0_2           | .....AGGGCCUUAUAGUCAAAGC.....                                                                                                                                                 |
| Bn. sRNA1445731_0_0_3_0         | .....AGCGCUAAGCUAUGAUUCC.....                                                                                                                                                 |
| Bn. sRNA3161671_0_0_0_2         | .....CUACAUAUCCAGGAGCUU.....                                                                                                                                                  |
| Bn. sRNA3161672_0_1_3_7         | .....CUACAUAUCCAGGAGCUUU.....                                                                                                                                                 |
| Bn. sRNA5368940_0_1_0_0         | .....UUUUGGAUUGAGGGAGCU.....                                                                                                                                                  |
| Bn. sRNA4824278_1_3_0_0         | .....UUUUGGAUUGAGG.....                                                                                                                                                       |
| Bn. sRNA4824279_1_0_0_0         | .....UUUUGGAUUGAGGG.....                                                                                                                                                      |
| Bn. sRNA4824280_5_5_0_0         | .....UUUUGGAUUGAGGGAG.....                                                                                                                                                    |
| Bn. sRNA4824282_11_3_0_0        | .....UUUUGGAUUGAGGGAGC.....                                                                                                                                                   |
| Bn. sRNA4824283_3_1_0_0         | .....UUUUGGAUUGAGGGAGCTC.....                                                                                                                                                 |
| Bn. sRNA3220733_1_2_0_2         | .....UUUUGGAUUGAGGG.....                                                                                                                                                      |
| Bn. sRNA3220734_0_1_6_0         | .....UUUUGGAUUGAGGGGA.....                                                                                                                                                    |
| Bn. sRNA3220735_4_6_0_3         | .....UUUUGGAUUGAGGGAG.....                                                                                                                                                    |
| Bn. sRNA3220736_5_3_0_2         | .....UUUUGGAUUGAGGGAGC.....                                                                                                                                                   |
| Bn. sRNA3220737_0_3_0_0         | .....UUUUGGAUUGAGGGAGCU.....                                                                                                                                                  |
| Bn. sRNA3220738_2_1_3_2         | .....UUUUGGAUUGAGGGAGCUCA.....                                                                                                                                                |
| Bn. sRNA553169_31_81_201_86     | .....UUUUGGAUUGAGGGGA.....                                                                                                                                                    |
| Bn. sRNA553172_105_173_32_7     | .....UUUUGGAUUGAGGGAG.....                                                                                                                                                    |
| Bn. sRNA553176_149_204_75_12    | .....UUUUGGAUUGAGGGAGC.....                                                                                                                                                   |
| Bn. sRNA553190_19_18_34_8       | .....UUUUGGAUUGAGGGAGCU.....                                                                                                                                                  |
| Bn. sRNA553194_0_1_3_0          | .....UUUUGGAUUGAGGGAGCTC.....                                                                                                                                                 |
| Bn. sRNA553195_1_1_0_0          | .....UUUUGGAUUGAGGGAGCU.....                                                                                                                                                  |
| Bn. sRNA553196_143_127_118_66   | .....UUUUGGAUUGAGGGAGCUCA.....                                                                                                                                                |
| Bn. sRNA553202_3_1_6_0          | .....UUUUGGAUUGAGGGAGCUCAAC.....                                                                                                                                              |
| Bn. sRNA5430809_0_1_3_5         | .....UUUUGGAUUGAGGGAG.....                                                                                                                                                    |
| Bn. sRNA5430810_1_2_6_2         | .....UUUUGGAUUGAGGGAGC.....                                                                                                                                                   |
| Bn. sRNA5430812_0_1_0_0         | .....UUUUGGAUUGAGGGAGCU.....                                                                                                                                                  |
| Bn. sRNA5430813_1_0_0_0         | .....UUUUGGAUUGAGGGAGCU.....                                                                                                                                                  |
| Bn. sRNA5430814_2_1_3_3         | .....UUUUGGAUUGAGGGAGCUCA.....                                                                                                                                                |
| Bn. sRNA5053026_0_1_0_0         | .....UUUUGGAUUGAGGGAGC.....                                                                                                                                                   |
| Bn. sRNA5053027_0_2_3_0         | .....UUUUGGAUUGAGGGAGCUCA.....                                                                                                                                                |
| Bn. sRNA383965_0_0_3_0          | .....UUUUGGAUUGAGGGAGCUCA.....                                                                                                                                                |

```

AUUCCCGA CA A A C UU- ----- AGA G A C A UC -| CU AUAU
GAA AAGA GUAGGGCCUU UAGUCAA GAGAGU AGC AGGUAA AAAGCU CU AG UAUG A CCAUA AGCC AAUCCU \
CUU UUCU CAUCUGAGGA GUUAGGUU UUCUCA UCG UCCCGUU UUUCGA GA UC AUAC U GGUAU UUGG UUAGGAA A
----- UC A A C UUU UUAUU CAA G C U A UC A U- AAAU

```

miRNA: Bn. sRNA553196\_143\_127\_118\_66  
miRNA\*: Bn. sRNA1574936\_0\_0\_2

#####  
#####

Bna-miR160a

Bna-miR160a\_AC189270\_-\_61934\_62052 GUAGUUGUAUAAGAUGUGUAUGCCUGGCCUCCUGUAUGCCAUCUUAAGCUCAUCGACCAUUGAUGACCUCCGUGAAUGGCGUAUGAGGAGCCAUGCAUUAUUUCAUAUACAUUUACA  
Bn. sRNA5455537\_0\_2\_0\_0 ... UUGUAUAAGAUGUGUAUGCCUG. ....  
Bn. sRNA4484622\_1\_0\_0\_0 ..... UAUGCCUGGCCUCCUGUAUGCCA. ....  
Bn. sRNA2117010\_0\_0\_3\_0 ..... AUGCCUGGCCUCCUGUAUG. ....  
Bn. sRNA2117011\_7\_7\_6\_3 ..... AUGCCUGGCCUCCUGUAUGCC. ....  
Bn. sRNA2117012\_3\_3\_0\_0 ..... AUGCCUGGCCUCCUGUAUGCCA. ....  
Bn. sRNA4974193\_42\_45\_178\_129 ..... UGCCUGGCCUCCUGUAUGCCA. ....  
Bn. sRNA4974196\_1\_0\_0\_2 ..... UGCCUGGCCUCCUGUAUGCCA. ....  
Bn. sRNA3690628\_3\_1\_0\_0 ..... GCCUGGCCUCCUGUAUGCCA. ....  
Bn. sRNA3690629\_0\_0\_0\_2 ..... GCCUGGCCUCCUGUAUGCCA. ....  
Bn. sRNA2786368\_0\_0\_0\_2 ..... CCUGGCCUCCUGUAUGCCA. ....  
Bn. sRNA2786370\_0\_0\_0\_2 ..... CCUGGCCUCCUGUAUGCCA. ....  
Bn. sRNA5065231\_0\_0\_0\_2 ..... UGCCUGGCCUCCUGUAUGCCA. ....  
Bn. sRNA5065232\_1\_0\_0\_0 ..... UGCCUGGCCUCCUGUAUGCCA. ....  
Bn. sRNA3855980\_2\_0\_9\_3 ..... GCGUAUGAGGAGCCAUGCA. ....  
Bn. sRNA3855981\_20\_15\_40\_22 ..... GCGUAUGAGGAGCCAUGCA. ....  
Bn. sRNA3855982\_0\_1\_3\_2 ..... GCGUAUGAGGAGCCAUGCA. ....  
Bn. sRNA3719074\_2\_1\_26\_10 ..... GCGUAUGAGGAGCCAUGCA. ....  
Bn. sRNA3719077\_2\_1\_6\_12 ..... GCGUAUGAGGAGCCAUGCA. ....  
Bn. sRNA3719078\_470\_373\_646\_636 ..... GCGUAUGAGGAGCCAUGCA. ....  
Bn. sRNA2964366\_0\_0\_0\_2 ..... CGUAUGAGGAGCCAUGCA. ....  
Bn. sRNA4028522\_0\_3\_0\_0 ..... GUAUGAGGAGCCAUGCA. ....  
Bn. sRNA4480144\_1\_0\_0\_0 ..... UAUGAGGAGCCAUGCA. ....  
Bn. sRNA4480145\_1\_0\_0\_0 ..... UAUGAGGAGCCAUGCAUUUU. ....  
Bn. sRNA4480146\_0\_1\_0\_0 ..... UAUGAGGAGCCAUGCAUUUU. ....  
Bn. sRNA2086855\_0\_1\_0\_0 ..... AUGAGGAGCCAUGCAUUUU. ....

-| U A UGU C CU CCUCUA C C  
GUAG UGUUA GA GUAUGC UGGUCC GUAUGCCAU AG UCAUCGA \  
CAUU ACAUAU CU UAUACG ACCGAGG UAUGCGGUA UC AGUAGUU C  
A^ U A UU- U AG AGUGCC C A

miRNA Bn. sRNA4974193\_42\_45\_178\_129  
miRNA\* Bn. sRNA3719078\_470\_373\_646\_636

Bna-miR160b

Bna-miR160b\_AC189245\_+\_87272\_87491 UCAUGCCUGGCCUCCUGUAUGCCACAAGUAGAUUAUUGAUUUUGGUUGAAAAAUCAGCUGCCAGUGGCGUACAAGGAGUCAAGCAUGA  
Bn. sRNA2638123\_1\_0\_0\_0 . CAUGCCUGGCCUCCUGUAUGCC. ....  
Bn. sRNA2117010\_0\_0\_3\_0 .. AUGCCUGGCCUCCUGUAUG. ....  
Bn. sRNA2117011\_7\_7\_6\_3 .. AUGCCUGGCCUCCUGUAUGCC. ....  
Bn. sRNA2117012\_3\_3\_0\_0 .. AUGCCUGGCCUCCUGUAUGCCA. ....  
Bn. sRNA4974193\_42\_45\_178\_129 ... UGCCUGGCCUCCUGUAUGCCA. ....  
Bn. sRNA3690628\_3\_1\_0\_0 .... GCCUGGCCUCCUGUAUGCCA. ....  
Bn. sRNA2786368\_0\_0\_0\_2 .... CCUGGCCUCCUGUAUGCCA. ....  
Bn. sRNA3718039\_1\_0\_0\_0 ..... GCGUACAAGGAGUCAAGCAU. .  
Bn. sRNA3718040\_21\_19\_26\_12 ..... GCGUACAAGGAGUCAAGCAUG. .  
Bn. sRNA2958695\_1\_0\_0\_0 ..... CGUACAAGGAGUCAAGCAUGA

C C AA AUA GGU  
UCAUGC UGGUCC UGUAUGCCAC GUAG UUGAUUUU \  
AGUACG ACUGAGG ACAUGCGGUG CGUC GACUAAAA U  
A A AC --- AAG

miRNA: Bn. sRNA4974193\_42\_45\_178\_129  
miRNA\*: Bn. sRNA3718040\_21\_19\_26\_12



Bna-miR160c

Bna-miR160c\_AC189471\_-143401\_143515 GUGUGUCUCUUAUGGUCUGCCUGGCCUCCUGUAUGCCACAAGUAUUAACCGAUCUCGUUACGAAAUCUGUGGCUAGUGCGGUACAGAGUAGUCAAGCAUGACCAAAGCUUUUC  
 Bn. sRNA4974193\_42\_45\_178\_129 .....UGCCUGGCCUCCUGUAUGCCA.....  
 Bn. sRNA3690628\_3\_1\_0\_0 .....GCCUGGCCUCCUGUAUGCCA.....  
 Bn. sRNA2786368\_0\_0\_0\_2 .....CCUGGCCUCCUGUAUGCCA.....  
 Bn. sRNA4434290\_1\_0\_0\_0 .....UAGUGGCGUACAGAGUAGUCAAGCA.....  
 Bn. sRNA5065149\_2\_0\_0\_0 .....UGGCGUACAGAGUAGUCAAGCA.....  
 Bn. sRNA3718069\_0\_0\_0\_2 .....GCGUACAGAGUAGUCAAGCA.....  
 Bn. sRNA3718070\_3\_1\_3\_3 .....GCGUACAGAGUAGUCAAGCAU.....  
 Bn. sRNA3718074\_32\_47\_46\_34 .....GCGUACAGAGUAGUCAAGCAUG.....  
 Bn. sRNA3718075\_1\_0\_0\_2 .....GCGUACAGAGUAGUCAAGCAUGA.....  
 Bn. sRNA2958852\_2\_2\_9\_5 .....CGUACAGAGUAGUCAAGCAUG.....  
 Bn. sRNA2958853\_7\_5\_20\_37 .....CGUACAGAGUAGUCAAGCAUGA.....  
 Bn. sRNA3994059\_0\_1\_0\_0 .....GUACAGAGUAGUCAAGCA.....  
 Bn. sRNA3994060\_3\_1\_3\_0 .....GUACAGAGUAGUCAAGCAUGA.....  
 Bn. sRNA4318997\_0\_0\_0\_2 .....UACAGAGUAGUCAAGCAUGACC.....  
 Bn. sRNA861295\_0\_0\_3\_0 .....ACAGAGUAGUCAAGCAUGACCA.....

GUGUGU| CUA C CC- A AUA C C U  
 GCU UGGUCGUGC UGGCU CUGUAUGCCAC AGU UAC GAU UCG \  
 CGA ACCAGUACG ACUGA GACAUGCGGUG UCG GUG CUA AGC U  
 CUUUU-^ A--- A UGA A --- U A A

miRNA: Bn. sRNA4974193\_42\_45\_178\_129  
 miRNA\*: Bn. sRNA3718074\_32\_47\_46\_34

Bna-miR160d

Bna-miR160d\_AC183492\_+98282\_98421 GUCAUGCCUGGCCUCCUGUAUGCCACAAGUAAAACCGAUCUCAUUAUGAAAUCGGACACUAGUGGCGUACAGAGUAGUCAAGCAUGAC  
 Bn. sRNA2638123\_1\_0\_0\_0 ..CAUGCCUGGCCUCCUGUAUGCC.....  
 Bn. sRNA2117010\_0\_0\_3\_0 ...AUGCCUGGCCUCCUGUAUG.....  
 Bn. sRNA2117011\_7\_7\_6\_3 ...AUGCCUGGCCUCCUGUAUGCC.....  
 Bn. sRNA2117012\_3\_3\_0\_0 ...AUGCCUGGCCUCCUGUAUGCCA.....  
 Bn. sRNA4974193\_42\_45\_178\_129 .....UGCCUGGCCUCCUGUAUGCCA.....  
 Bn. sRNA3690628\_3\_1\_0\_0 .....GCCUGGCCUCCUGUAUGCCA.....  
 Bn. sRNA2786368\_0\_0\_0\_2 .....CCUGGCCUCCUGUAUGCCA.....  
 Bn. sRNA4434290\_1\_0\_0\_0 .....UAGUGGCGUACAGAGUAGUCAAGCA...  
 Bn. sRNA5065149\_2\_0\_0\_0 .....UGGCGUACAGAGUAGUCAAGCA...  
 Bn. sRNA3718069\_0\_0\_0\_2 .....GCGUACAGAGUAGUCAAGCA...  
 Bn. sRNA3718070\_3\_1\_3\_3 .....GCGUACAGAGUAGUCAAGCAU...  
 Bn. sRNA3718074\_32\_47\_46\_34 .....GCGUACAGAGUAGUCAAGCAUG...  
 Bn. sRNA3718075\_1\_0\_0\_2 .....GCGUACAGAGUAGUCAAGCAUGA...  
 Bn. sRNA2958852\_2\_2\_9\_5 .....CGUACAGAGUAGUCAAGCAUG...  
 Bn. sRNA2958853\_7\_5\_20\_37 .....CGUACAGAGUAGUCAAGCAUGA...  
 Bn. sRNA3994059\_0\_1\_0\_0 .....GUACAGAGUAGUCAAGCA...  
 Bn. sRNA3994060\_3\_1\_3\_0 .....GUACAGAGUAGUCAAGCAUGA...  
 Bn. sRNA4318997\_0\_0\_0\_2 .....UACAGAGUAGUCAAGCAUGAC...  
 Bn. sRNA861295\_0\_0\_3\_0 .....ACAGAGUAGUCAAGCAUGAC

C CC-| A AAAUA C AU  
 GUCAUGC UGGCU CUGUAUGCCAC AGU CCGAU UC \  
 CAGUACG ACUGA GACAUGCGGUG UCA GGCUA AG U  
 A UGA^ A CA--- A UA

miRNA: Bn. sRNA4974193\_42\_45\_178\_129  
 miRNA\*: Bn. sRNA3718074\_32\_47\_46\_34

#####  
#####

Bna-miR162a

Bna-miR162a\_AC189332+\_56547\_56660 AGUGAAAGAUGCUGGAGGCAGCGGUUGAUCGAUCUCUUUGUGGGAAUUUUUGAAAAACAAAUUAAAAGCAUGAACAGAU CGAUAAACUGUGCAUCCAGCGGUCGCCUCUUA  
Bn. sRNA3815547\_0\_3\_0\_3 .....GGAGGCAGCGGUUGAUCGAUC.....  
Bn. sRNA4678236\_0\_8\_3\_8 .....UCGAUAAACUGUGCAUCCAG.....

A-----| AAGA G GC G C UG GAAU-- AA  
GUGA UGCUGGA GCA GGUU AUCGAUCU UU UG UUUUG \  
CGCU GCGACCU CGU CCAA UAGCUAGA AA AC AAAAC A  
ACUUCUC^ G--- A GU A C GU GAAAAU AA

miRNA: Bn. sRNA4678236\_0\_8\_3\_8  
miRNA\*: Bn. sRNA3815547\_0\_3\_0\_3

#####  
#####

Bna-miR164a

Bna-miR164a\_AC232484+\_29694\_29784 CCUCCACGUUGGAGAAGCAGGGCAGUGCAAACCAACAAACAGAGAUCUAUCUCAUGUAAUUUGCACGUGCUCCACUCCUCCAACAUGAG  
Bn. sRNA5031411\_0\_0\_0\_3 ..... UGGAGAAGCAGGGCA.....  
Bn. sRNA5031420\_1\_3\_9\_0 ..... UGGAGAAGCAGGGCAGC.....  
Bn. sRNA5031431\_1\_1\_0\_3 ..... UGGAGAAGCAGGGCAGCU.....  
Bn. sRNA5031436\_3\_0\_17\_3 ..... UGGAGAAGCAGGGCAGUG.....  
Bn. sRNA5031440\_2\_2\_11\_14 ..... UGGAGAAGCAGGGCAGGUC.....  
Bn. sRNA5031441\_1281\_1084\_2762\_2386 ..... UGGAGAAGCAGGGCAGGUGCA.....  
Bn. sRNA5031442\_0\_1\_3\_0 ..... UGGAGAAGCAGGGCAGGUGCAA.....  
Bn. sRNA5031443\_1\_0\_0\_0 ..... UGGAGAAGCAGGGCAGGUGCAA.....  
Bn. sRNA5031444\_1\_1\_0\_0 ..... UGGAGAAGCAGGGCAGGUGCAAAC.....  
Bn. sRNA3800030\_1\_0\_0\_0 ..... GGAGAAGCAGGGCAGC.....  
Bn. sRNA3800032\_145\_148\_9\_3 ..... GGAGAAGCAGGGCAGGUGCA.....  
Bn. sRNA3423586\_6\_2\_0\_0 ..... GAGAAGCAGGGCAGGUGCA.....

C CAC A CA CCAACAA C U  
CUC GUUGGAG AG GGGCAGGUGCAA ACA GAGA C  
GAG CAACCUC UC CUCGUCACGUUU UGU CUCU U  
- UA- C AC AA----- A A

miRNA: Bn. sRNA5031441\_1281\_1084\_2762\_2386

Bna-miR164b

Bna-miR164b\_AC189579\_-50877\_50986 GUUACACUUGCUGGAGAAGCAGGGCAGGUGCGAACAAGAGAU CGAU CGGUAUUGUUAUCAUUAUUUCGCACGUGUUCUACUCCAACACGUGUGCCUCCCCUC  
Bn. sRNA5415476\_0\_1\_0\_0 ..... UUGCUGGAGAAGCAGGGCAGGUG.....  
Bn. sRNA4996505\_1\_0\_0\_0 ..... UGCUGGAGAAGCAGGGCAGCU.....  
Bn. sRNA5031411\_0\_0\_0\_3 ..... UGGAGAAGCAGGGCA.....  
Bn. sRNA5031420\_1\_3\_9\_0 ..... UGGAGAAGCAGGGCAGC.....  
Bn. sRNA5031431\_1\_1\_0\_3 ..... UGGAGAAGCAGGGCAGCU.....  
Bn. sRNA5031436\_3\_0\_17\_3 ..... UGGAGAAGCAGGGCAGGUG.....  
Bn. sRNA5031440\_2\_2\_11\_14 ..... UGGAGAAGCAGGGCAGGUC.....  
Bn. sRNA5031452\_50\_69\_189\_93 ..... UGGAGAAGCAGGGCAGGUGCG.....  
Bn. sRNA5031453\_1\_0\_0\_0 ..... UGGAGAAGCAGGGCAGGUGCGA.....  
Bn. sRNA3800030\_1\_0\_0\_0 ..... GGAGAAGCAGGGCAGC.....  
Bn. sRNA3800034\_4\_13\_0\_2 ..... GGAGAAGCAGGGCAGGUGCG.....  
Bn. sRNA3423587\_0\_0\_3\_0 ..... GAGAAGCAGGGCAGGUGCG.....

GU-----| U C A C CA A CGG  
UACAC UG UGGAG AG AGGGCAGGUGCGAA AAUG GAUCGAU U  
GUGUG AC ACCUC UC UCUUGUCACGCUU UUAU CUAGUUG A  
CUCCCCUCC^ C A A A -- A UAU

miRNA: Bn. sRNA5031452\_50\_69\_189\_93

Bna-miR164c

Bna-miR164c\_AC189626+\_18955\_19045 AACACUUGCUGGAGAAGCAGGGCAGGUGCGAACUAAUGAGAGAUUCUGUGCAUGUUGAUCAUAUUUUUGCAGGUGUUCUACUACUCCAACAC  
 Bn. sRNA5415476\_0\_1\_0\_0 ..... UUGCUGGAGAAGCAGGGCAGGUG.....  
 Bn. sRNA4996505\_1\_0\_0\_0 ..... UGCUGGAGAAGCAGGGCAGGU.....  
 Bn. sRNA5031411\_0\_0\_0\_3 ..... UGGAGAAGCAGGGCA.....  
 Bn. sRNA5031420\_1\_3\_9\_0 ..... UGGAGAAGCAGGGCAGG.....  
 Bn. sRNA5031431\_1\_1\_0\_3 ..... UGGAGAAGCAGGGCAGGU.....  
 Bn. sRNA5031436\_3\_0\_17\_3 ..... UGGAGAAGCAGGGCAGGUG.....  
 Bn. sRNA5031440\_2\_2\_11\_14 ..... UGGAGAAGCAGGGCAGGUGC.....  
 Bn. sRNA5031452\_50\_69\_189\_93 ..... UGGAGAAGCAGGGCAGGUGCG.....  
 Bn. sRNA5031453\_1\_0\_0\_0 ..... UGGAGAAGCAGGGCAGGUGCGA.....  
 Bn. sRNA3800030\_1\_0\_0\_0 ..... GGAGAAGCAGGGCAGG.....  
 Bn. sRNA3800034\_4\_13\_0\_2 ..... GGAGAAGCAGGGCAGGUGCG.....  
 Bn. sRNA3423587\_0\_0\_3\_0 ..... GAGAAGCAGGGCAGGUGCG.....

AACACU| C A C CUA GA CUG  
 UG UGGAG AG AGGGCAGGUGCGAA AUGA GAU U  
 AC ACCUC UC UCUUGUGCACGUUU UACU UUG G  
 C-----^ A A A UUA AG UAC

miRNA: Bn. sRNA5031452\_50\_69\_189\_93

Bna-miR164d

Bna-miR164d\_AC189657\_-5269\_5378 GUAUCACUUGCUGGAGAAGCAGGGCAGGUGCGAACAAUUGAGUUGAGCAGUACAUUUUGAUCAAUAUUCGCAGGUGUUCUACUACUCCAACACGUGUAUCUCCCCUUC  
 Bn. sRNA5415476\_0\_1\_0\_0 ..... UUGCUGGAGAAGCAGGGCAGGUG.....  
 Bn. sRNA4996505\_1\_0\_0\_0 ..... UGCUGGAGAAGCAGGGCAGGU.....  
 Bn. sRNA5031411\_0\_0\_0\_3 ..... UGGAGAAGCAGGGCA.....  
 Bn. sRNA5031420\_1\_3\_9\_0 ..... UGGAGAAGCAGGGCAGG.....  
 Bn. sRNA5031431\_1\_1\_0\_3 ..... UGGAGAAGCAGGGCAGGU.....  
 Bn. sRNA5031436\_3\_0\_17\_3 ..... UGGAGAAGCAGGGCAGGUG.....  
 Bn. sRNA5031440\_2\_2\_11\_14 ..... UGGAGAAGCAGGGCAGGUGC.....  
 Bn. sRNA5031452\_50\_69\_189\_93 ..... UGGAGAAGCAGGGCAGGUGCG.....  
 Bn. sRNA5031453\_1\_0\_0\_0 ..... UGGAGAAGCAGGGCAGGUGCGA.....  
 Bn. sRNA3800030\_1\_0\_0\_0 ..... GGAGAAGCAGGGCAGG.....  
 Bn. sRNA3800034\_4\_13\_0\_2 ..... GGAGAAGCAGGGCAGGUGCG.....  
 Bn. sRNA3423587\_0\_0\_3\_0 ..... GAGAAGCAGGGCAGGUGCG.....

-----| U U C A C CAAAUGA G UA  
 GUA CAC UG UGGAG AG AGGGCAGGUGCGAA GUUUGA CAG C  
 UAU GUG AC ACCUC UC UCUUGUGCACGCUU UAAACU GUU A  
 CUUCCCCUC^ - C A A A A----- A UU

miRNA: Bn. sRNA5031452\_50\_69\_189\_93

#####  
#####

Bna-miR166f

```
Bna-miR166f_AC232510_-_45824_45973      AGUUGAGGGGAUGUUCUGGACCGAGGAUUAUUAUACACACAUAUAUUAUGUUAACAAGUGAUCAAUCAUAUAUAUAUUAUUAUAGAGUAUUCUGGACCGAGGCUUCAUCCCCCUAACAU
Bn. sRNA3787075_0_1_3_0                  ..... GGAUGUUGUCUGGACCGAGGA .....
Bn. sRNA3351375_0_1_0_0                  ..... GAAUGUUGUCUGGACCGAGGA .....
Bn. sRNA2188152_0_1_0_0                  ..... AUGUAUAUAGAGUAUUCUGGAC .....
Bn. sRNA5349559_0_1_0_0                  ..... UUCUGGACCGAGGCUUCAUCC .....
Bn. sRNA4752522_0_0_0_2                  ..... UCUGGACCGAGGCUUCAUCC .....
Bn. sRNA4752523_1_0_0_0                  ..... UCUGGACCGAGGCUUCAUCC .....
Bn. sRNA3072599_0_1_0_0                  ..... CUCGACCGAGGCUUCAUC .....
Bn. sRNA3072600_0_2_0_0                  ..... CUCGACCGAGGCUUCAUCC .....
Bn. sRNA3072601_1_0_0_0                  ..... CUCGACCGAGGCUUCAUCC .....
Bn. sRNA3072602_1_2_0_0                  ..... CUCGACCGAGGCUUCAUCC .....
Bn. sRNA4694620_0_0_3_2                  ..... UCGGACCGAGGCUUCA .....
Bn. sRNA4694633_4_3_11_0                  ..... UCGGACCGAGGCUUCA .....
Bn. sRNA4694636_0_4_0_0                  ..... UCGGACCGAGGCUUCAUC .....
Bn. sRNA4694639_11_17_11_10              ..... UCGGACCGAGGCUUCAUC .....
Bn. sRNA4694642_19_20_6_3                ..... UCGGACCGAGGCUUCAUCC .....
Bn. sRNA4694644_5_7_17_5                ..... UCGGACCGAGGCUUCAUCC .....
Bn. sRNA4694646_331_444_290_210          ..... UCGGACCGAGGCUUCAUCC .....
Bn. sRNA4694648_0_0_3_0                  ..... UCGGACCGAGGCUUCAUCC .....
Bn. sRNA2903030_0_1_0_0                  ..... CGGACCGAGGCUUCAUCC .....
Bn. sRNA2903031_0_1_3_0                  ..... CGGACCGAGGCUUCAUCC .....
Bn. sRNA2903032_7_11_0_0                ..... CGGACCGAGGCUUCAUCC .....
Bn. sRNA3791953_0_1_0_0                  ..... GGACCGAGGCUUCAUCC .....
Bn. sRNA3791954_3_3_0_3                  ..... GGACCGAGGCUUCAUCC .....
```

```
A---  A  A  UU  A      A  CAC  CA  -  ACA
      GUUG GGGG AUG  GUCUGG CCGAGGAUUAU UAUA  ACAUA  UAUAUAUG UUGAU  \
      CAU  CCCC UAC  CCGACC GGCUCUUAUGA AUAU  UGUAU  AUAUAUAC AACUA  A
UGUA  C  C  UU  A      G  A--  A-  U  GUG
```

miRNA: Bn. sRNA4694646\_331\_444\_290\_210  
miRNA\*: Bn. sRNA3787075\_0\_1\_3\_0

#####  
#####

Bna-miR166c

```
Bna-miR166c_AC189591_-_50396_50505      CAGGUGGAUGAUGCUUGGCUCGAGACCAUAAAUAUGAUAUUGUGAUGUUGAUGAUGAUGAUGAUAAGUAUAUAGUCGGACCGAGGCUUCAUCCCCCUAACUUA
Bn. sRNA5048936_2_7_11_3                  .... UGGAUGAUGCUUGGCUCGAGA .....
Bn. sRNA4056190_8_6_11_2                  ..... GUCGGACCGAGGCUUCAUCC .....
Bn. sRNA4056191_0_0_0_2                  ..... GUCGGACCGAGGCUUCAUCC .....
Bn. sRNA4694620_0_0_3_2                  ..... UCGGACCGAGGCUUCA .....
Bn. sRNA4694633_4_3_11_0                  ..... UCGGACCGAGGCUUCAU .....
Bn. sRNA4694657_3_7_3_2                  ..... UCGGACCGAGGCUUCAU .....
Bn. sRNA4694665_18_26_3_2                ..... UCGGACCGAGGCUUCAU .....
Bn. sRNA4694669_36_79_29_17              ..... UCGGACCGAGGCUUCAU .....
Bn. sRNA4694673_52_44_20_22              ..... UCGGACCGAGGCUUCAU .....
Bn. sRNA4694675_5697_4659_2414_2119      ..... UCGGACCGAGGCUUCAUCC .....
Bn. sRNA4694681_7_7_14_7                  ..... UCGGACCGAGGCUUCAUCC .....
Bn. sRNA2903034_1_2_0_0                  ..... CGGACCGAGGCUUCAUCC .....
Bn. sRNA2903036_2_2_3_0                  ..... CGGACCGAGGCUUCAUCC .....
Bn. sRNA2903038_140_117_11_3              ..... CGGACCGAGGCUUCAUCC .....
Bn. sRNA2903040_0_1_0_0                  ..... CGGACCGAGGCUUCAUCC .....
Bn. sRNA3791955_0_0_0_2                  ..... GGACCGAGGCUUCAUCC .....
Bn. sRNA3791956_33_25_20_8                ..... GGACCGAGGCUUCAUCC .....
```

```
C-----  U  U  CU  GAC-  AA--|  G  UG  G  G
      AGG GGAUGA GCUUGG CGA  CAUUA  UAU AUCAU  U AU U
      UCC CUUACU CCGACC GCU  GUAUU  AUA UAGUA  A UA U
CAUUAAC  C  U  AG  GAUA  AGUA^  G  GU  G  G
```

miRNA: Bn. sRNA4694675\_5697\_4659\_2414\_2119  
miRNA\*: Bn. sRNA5048936\_2\_7\_11\_3



#####  
#####

Bna-miR167c

```
Bna-miR167c_AC189327_-_168_280      CCGGCAUCUGAUGAAGCUGCCAGCAUGAUCUAGUUAACUUUUUUCUCCGUUGUUUAUCCAUGACAAUGGAAAAGGGAUAAGUGUCGAUUAGAUCAGUUCGUAGUUUCACCC
Bn. sRNA4773673_1_2_6_5              ..... UCUGAUGAAGCUGCCAGCAUG. ....
Bn. sRNA3567279_0_1_3_0              ..... GAUGAAGCUGCCAGCAUGAUCUA. ....
Bn. sRNA2064738_0_1_0_0              ..... AUGAAGCUGCCAGCAUGAUCU. ....
Bn. sRNA2064739_0_0_2                ..... AUGAAGCUGCCAGCAUGAUCUA. ....
Bn. sRNA4855991_0_2_23_19            ..... UGAAGCUGCCAGCAU. ....
Bn. sRNA4856038_3_8_425_34           ..... UGAAGCUGCCAGCAUG. ....
Bn. sRNA4856039_90_155_1633_1211     ..... UGAAGCUGCCAGCAUGA. ....
Bn. sRNA4856081_6_17_164_71          ..... UGAAGCUGCCAGCAUGAU. ....
Bn. sRNA4856107_192_271_1157_1022    ..... UGAAGCUGCCAGCAUGAUC. ....
Bn. sRNA4856120_291_445_2512_1541    ..... UGAAGCUGCCAGCAUGAUCU. ....
Bn. sRNA4856121_42571_69841_195410_237219 ..... UGAAGCUGCCAGCAUGAUCUA. ....
Bn. sRNA4856141_87_102_293_304       ..... UGAAGCUGCCAGCAUGAUCUAG. ....
Bn. sRNA4856157_0_5_0_3              ..... UGAAGCUGCCAGCAUGAUCUAGU. ....
Bn. sRNA3316423_0_0_3_0              ..... GAAGCUGCCAGCAUG. ....
Bn. sRNA3316424_0_6_6_0              ..... GAAGCUGCCAGCAUGA. ....
Bn. sRNA3316427_0_0_3_0              ..... GAAGCUGCCAGCAUGAU. ....
Bn. sRNA3316431_1_4_0_0              ..... GAAGCUGCCAGCAUGAUC. ....
Bn. sRNA3316433_2_6_9_2              ..... GAAGCUGCCAGCAUGAUCU. ....
Bn. sRNA3316434_542_778_287_83       ..... GAAGCUGCCAGCAUGAUCUA. ....
Bn. sRNA3316436_1_3_0_0              ..... GAAGCUGCCAGCAUGAUCUAG. ....
Bn. sRNA532960_0_1_0_0              ..... AAGCUGCCAGCAUGA. ....
Bn. sRNA532962_2_1_0_0              ..... AAGCUGCCAGCAUGAUCU. ....
Bn. sRNA532963_72_147_63_19         ..... AAGCUGCCAGCAUGAUCUA. ....
Bn. sRNA532966_1_1_0_0              ..... AAGCUGCCAGCAUGAUCUAG. ....
Bn. sRNA532967_0_0_0_2              ..... AAGCUGCCAGCAUGAUCUAGU. ....
Bn. sRNA1445373_0_0_0_2              ..... AGCUGCCAGCAUGAUCUA. ....
Bn. sRNA3120513_0_0_3_0              ..... CUGCCAGCAUGAUCUA. ....
Bn. sRNA4970108_0_1_14_3            ..... UGCCAGCAUGAUCUA. ....
Bn. sRNA2457669_1_0_0_0              ..... CAAUGGAAAAGGGAUAAGUGUCGAU. ....
Bn. sRNA2235983_0_0_0_2              ..... AUUAGAUCAGUUCGUAGUUUCAC. .
Bn. sRNA4388512_0_1_0_0              ..... UAGAUCAGUUCGUAGUUUCA. .
Bn. sRNA1334538_0_0_0_2              ..... AGAUCAGUUCGUAGUUUCACC.
Bn. sRNA3553134_0_1_0_0              ..... GAUCAUGUUCGUAGUUU. . .
Bn. sRNA3553136_1_0_0_0              ..... GAUCAUGUUCGUAGUUUCA. .
Bn. sRNA3553139_113_120_161_238     ..... GAUCAUGUUCGUAGUUUCACC.
Bn. sRNA1968270_1_1_9_8              ..... AUCAUGUUCGUAGUUUCACC.
Bn. sRNA1968272_1_0_0_2              ..... AUCAUGUUCGUAGUUUCACCC
Bn. sRNA2209238_0_1_0_2              ..... AUGUUCGUAGUUUCACC.
```

```
CCGGCAUCUGA      C      UA -   UU ---|   UAU
      UGAAGCUGC AGCAUGAUCUAGU AC UUUAU C  UCCGUUGUU \
      ACUUUGAUG UUGUACUAGAUUA UG GAAUA G  AGGUAACAG C
C-----CC      C      GC U   GG AAA^   UAC
```

miRNA: Bn. sRNA4856121\_42571\_69841\_195410\_237219  
miRNA\*: Bn. sRNA3553139\_113\_120\_161\_238

Bna-miR167d

|                                          |                                                                                          |
|------------------------------------------|------------------------------------------------------------------------------------------|
| Bna-miR167d_UC96481_+_199_288            | UUUUGGGAGGCUGAAGCUGCCAGCAUGAUCUGUGUAUAGAUAGUGGUACCAGAUAUCCUGCGGCUUCAUUCACUAAAUCACCAACAAU |
| Bn. sRNA3099511_0_0_0_2                  | ..... CUGAAGCUGCCAGCAUGA.....                                                            |
| Bn. sRNA3099514_2_0_3_3                  | ..... CUGAAGCUGCCAGCAUGAUCU.....                                                         |
| Bn. sRNA3099518_0_0_0_2                  | ..... CUGAAGCUGCCAGCAUGAUCUG.....                                                        |
| Bn. sRNA4855991_0_2_23_19                | ..... UGAAGCUGCCAGCAU.....                                                               |
| Bn. sRNA4856038_3_8_425_34               | ..... UGAAGCUGCCAGCAUG.....                                                              |
| Bn. sRNA4856039_90_155_1633_1211         | ..... UGAAGCUGCCAGCAUGA.....                                                             |
| Bn. sRNA4856081_6_17_164_71              | ..... UGAAGCUGCCAGCAUGAU.....                                                            |
| Bn. sRNA4856107_192_271_1157_1022        | ..... UGAAGCUGCCAGCAUGAUC.....                                                           |
| <b>Bn. sRNA4856120_291_445_2512_1541</b> | <b>..... UGAAGCUGCCAGCAUGAUCU.....</b>                                                   |
| Bn. sRNA4856198_33_44_123_176            | ..... UGAAGCUGCCAGCAUGAUCUG.....                                                         |
| Bn. sRNA4856203_0_0_11_10                | ..... UGAAGCUGCCAGCAUGAUCUGU.....                                                        |
| Bn. sRNA3316423_0_0_3_0                  | ..... GAAGCUGCCAGCAUG.....                                                               |
| Bn. sRNA3316424_0_6_6_0                  | ..... GAAGCUGCCAGCAUGA.....                                                              |
| Bn. sRNA3316427_0_0_3_0                  | ..... GAAGCUGCCAGCAUGAU.....                                                             |
| Bn. sRNA3316431_1_4_0_0                  | ..... GAAGCUGCCAGCAUGAUC.....                                                            |
| Bn. sRNA3316433_2_6_9_2                  | ..... GAAGCUGCCAGCAUGAUCU.....                                                           |
| Bn. sRNA3316441_0_1_3_0                  | ..... GAAGCUGCCAGCAUGAUCUG.....                                                          |
| Bn. sRNA532960_0_1_0_0                   | ..... AAGCUGCCAGCAUGA.....                                                               |
| Bn. sRNA532962_2_1_0_0                   | ..... AAGCUGCCAGCAUGAUCU.....                                                            |
| Bn. sRNA1334281_1_0_0_0                  | ..... AGAUAUCCUGCGGCUUCA.....                                                            |
| <b>Bn. sRNA1334282_26_27_14_14</b>       | <b>..... AGAUAUCCUGCGGCUUCAU.....</b>                                                    |
| Bn. sRNA4982182_0_0_3_0                  | ..... UGCGGCUUCAUUCACUAAA.....                                                           |

```

U-----|   A GC       C C       U   AGA
          UUUGGG G  UGAAGCUGC AG AUGAUCUG GUAU  U
          AAACUC C  ACUUCGGCG UC UACUAGAC CAUG  A
UAACAACCACU^  A UU       - C       -   GUG

```

miRNA: Bn. sRNA4856120\_291\_445\_2512\_1541  
miRNA\*: Bn. sRNA1334282\_26\_27\_14\_14

#####  
#####

Bna-miR168b

|                                            |                                                                                                                             |
|--------------------------------------------|-----------------------------------------------------------------------------------------------------------------------------|
| Bna-miR168b_AC232514_+_114778_114907       | ACCGUCUUGCUCGGAUUCGCUUGGUCAGGUCGGGAACAAUUGUCUGACACAUCCAGAAUUUUAUCUGCGGUUUGAGCAGGGAUUGGAUCCCGCCUUGCAUCAAUUGAAUCGGAGUCCUGAUGG |
| Bn. sRNA2763551_0_0_0_2                    | . CCGUCUUGCUCGGAUUCGCUUGGU.....                                                                                             |
| Bn. sRNA3073391_0_1_0_0                    | ..... CUCGGAUUCGCUUGGU.....                                                                                                 |
| Bn. sRNA3073392_2_0_9_2                    | ..... CUCGGAUUCGCUUGGUCAGG.....                                                                                             |
| Bn. sRNA3073393_0_1_0_0                    | ..... CUCGGAUUCGCUUGGUCAGGUCG.....                                                                                          |
| Bn. sRNA3607937_0_0_0_2                    | ..... GAUUCGCUUGGUCAGGUCGG.....                                                                                             |
| Bn. sRNA2266594_1_0_0_0                    | ..... AUUCGCUUGGUCAGGUCGGAA.....                                                                                            |
| Bn. sRNA5332174_0_0_0_2                    | ..... UUCGCUUGGUCAGG.....                                                                                                   |
| Bn. sRNA5332180_0_1_0_0                    | ..... UUCGCUUGGUCAGGUCGG.....                                                                                               |
| Bn. sRNA5332181_274_299_273_335            | ..... UUCGCUUGGUCAGGUCGGAA.....                                                                                             |
| Bn. sRNA5332182_9_8_0_0                    | ..... UUCGCUUGGUCAGGUCGGAA.....                                                                                             |
| Bn. sRNA5332183_1_0_0_0                    | ..... UUCGCUUGGUCAGGUCGGAAAC.....                                                                                           |
| Bn. sRNA4690395_0_1_0_0                    | ..... UCGCUUGGUCAGGU.....                                                                                                   |
| Bn. sRNA4690473_2_0_3_0                    | ..... UCGCUUGGUCAGGUCGG.....                                                                                                |
| Bn. sRNA4690489_7_9_17_7                   | ..... UCGCUUGGUCAGGUCGG.....                                                                                                |
| Bn. sRNA4690490_459_459_830_663            | ..... UCGCUUGGUCAGGUCGGAA.....                                                                                              |
| <b>Bn. sRNA4690491_7043_7044_9958_9512</b> | <b>..... UCGCUUGGUCAGGUCGGAA.....</b>                                                                                       |
| Bn. sRNA4690494_1173_1196_1395_1392        | ..... UCGCUUGGUCAGGUCGGAAAC.....                                                                                            |
| Bn. sRNA2891117_7_6_9_3                    | ..... CGCUUGGUCAGGUCGGAA.....                                                                                               |
| Bn. sRNA2891118_80_56_23_12                | ..... CGCUUGGUCAGGUCGGAA.....                                                                                               |
| Bn. sRNA2891119_8_4_0_2                    | ..... CGCUUGGUCAGGUCGGAAAC.....                                                                                             |
| Bn. sRNA3762592_1_2_17_7                   | ..... GCUUGGUCAGGUCGGAA.....                                                                                                |
| Bn. sRNA3762593_18_21_57_32                | ..... GCUUGGUCAGGUCGGAA.....                                                                                                |
| Bn. sRNA3762594_2_8_9_7                    | ..... GCUUGGUCAGGUCGGAAAC.....                                                                                              |
| Bn. sRNA3203607_0_0_0_2                    | ..... CUUGGUCAGGUCGGAA.....                                                                                                 |
| Bn. sRNA3203608_0_0_9_0                    | ..... CUUGGUCAGGUCGGAA.....                                                                                                 |
| Bn. sRNA3203609_1_0_0_0                    | ..... CUUGGUCAGGUCGGAAAC.....                                                                                               |
| Bn. sRNA5446448_0_0_3_0                    | ..... UUGGUCAGGUCGGAA.....                                                                                                  |
| Bn. sRNA5446449_0_2_0_2                    | ..... UUGGUCAGGUCGGAA.....                                                                                                  |
| Bn. sRNA5108896_0_0_0_2                    | ..... UGGUCAGGUCGGAA.....                                                                                                   |
| Bn. sRNA3948409_0_0_3_2                    | ..... GGUCAGGUCGGAA.....                                                                                                    |
| Bn. sRNA3948410_1_0_0_0                    | ..... GGUCAGGUCGGAAAC.....                                                                                                  |
| Bn. sRNA2727366_0_0_0_2                    | ..... CCCGCCUUGCAUCAA.....                                                                                                  |
| <b>Bn. sRNA2727367_0_0_0_2</b>             | <b>..... CCCGCCUUGCAUCAAUGAU.....</b>                                                                                       |

A UU- G C U A G A- U-| CG UU  
 CCGUC GCUC GAUUCG UUGGUGCAGG CCGGA CCAAUU UCUG CACA CCA AAG \  
 GGUAG UGAG CUAAGU AACUACGUUC GCCCU GGUUAG GGAC GUGU GGU UUC U  
 - UCC G A C A - GA UU^ CG AU

miRNA: Bn. sRNA4690491\_7043\_7044\_9958\_9512  
 miRNA\*: Bn. sRNA2727367\_0\_0\_0\_2

Bna-miR168a

|                                     |                                                                                                                           |
|-------------------------------------|---------------------------------------------------------------------------------------------------------------------------|
| Bna-miR168a_AC189658_-_43455_43584  | AUGUUACGGCGGCCUCGACUCGCUUGGUGCAGGUCGGGAACUGAUUGGCUGACCCGCCACGUGCUUCCAUGGUGCUUGAGCAGGGAUCGGAUCCCGCCUUGUAUCAAGGAAUCCGAGUCCG |
| Bn. sRNA1065026_1_0_0_0             | ..... ACUCGCUUGGUGCAGGUCGGG.....                                                                                          |
| Bn. sRNA1065027_0_0_0_2             | ..... ACUCGCUUGGUGCAGGUCGGGA.....                                                                                         |
| Bn. sRNA3071826_2_2_6_3             | ..... CUCGCUUGGUGCAGGUCGGGA.....                                                                                          |
| Bn. sRNA3071827_8_10_3_2            | ..... CUCGCUUGGUGCAGGUCGGGAA.....                                                                                         |
| Bn. sRNA3071828_0_3_0_0             | ..... CUCGCUUGGUGCAGGUCGGGAAC.....                                                                                        |
| Bn. sRNA4690395_0_1_0_0             | ..... UCGCUUGGUGCAGGU.....                                                                                                |
| Bn. sRNA4690473_2_0_3_0             | ..... UCGCUUGGUGCAGGUCGG.....                                                                                             |
| Bn. sRNA4690489_7_9_17_7            | ..... UCGCUUGGUGCAGGUCGGG.....                                                                                            |
| Bn. sRNA4690490_459_459_830_663     | ..... UCGCUUGGUGCAGGUCGGGA.....                                                                                           |
| Bn. sRNA4690491_7043_7044_9958_9512 | ..... UCGCUUGGUGCAGGUCGGGA.....                                                                                           |
| Bn. sRNA4690494_1173_1196_1395_1392 | ..... UCGCUUGGUGCAGGUCGGGAAC.....                                                                                         |
| Bn. sRNA4690497_1_4_0_0             | ..... UCGCUUGGUGCAGGUCGGGAACU.....                                                                                        |
| Bn. sRNA4690498_8_6_17_8            | ..... UCGCUUGGUGCAGGUCGGGAACUG.....                                                                                       |
| Bn. sRNA2891117_7_6_9_3             | ..... CGCUUGGUGCAGGUCGGGA.....                                                                                            |
| Bn. sRNA2891118_80_56_23_12         | ..... CGCUUGGUGCAGGUCGGGAA.....                                                                                           |
| Bn. sRNA2891119_8_4_0_2             | ..... CGCUUGGUGCAGGUCGGGAAC.....                                                                                          |
| Bn. sRNA2891120_0_1_0_0             | ..... CGCUUGGUGCAGGUCGGGAACU.....                                                                                         |
| Bn. sRNA3762592_1_2_17_7            | ..... GCUUGGUGCAGGUCGGGA.....                                                                                             |
| Bn. sRNA3762593_18_21_57_32         | ..... GCUUGGUGCAGGUCGGGA.....                                                                                             |
| Bn. sRNA3762594_2_8_9_7             | ..... GCUUGGUGCAGGUCGGGAAC.....                                                                                           |
| Bn. sRNA3762595_0_0_3_0             | ..... GCUUGGUGCAGGUCGGGAACU.....                                                                                          |
| Bn. sRNA3762596_2_1_3_0             | ..... GCUUGGUGCAGGUCGGGAACUG.....                                                                                         |
| Bn. sRNA3203607_0_0_0_2             | ..... CUUGGUGCAGGUCGGGA.....                                                                                              |
| Bn. sRNA3203608_0_0_9_0             | ..... CUUGGUGCAGGUCGGGA.....                                                                                              |
| Bn. sRNA3203609_1_0_0_0             | ..... CUUGGUGCAGGUCGGGAAC.....                                                                                            |
| Bn. sRNA3203610_0_3_3_2             | ..... CUUGGUGCAGGUCGGGAACUG.....                                                                                          |
| Bn. sRNA5446448_0_0_3_0             | ..... UUGGUGCAGGUCGGGA.....                                                                                               |
| Bn. sRNA5446449_0_2_0_2             | ..... UUGGUGCAGGUCGGGA.....                                                                                               |
| Bn. sRNA5108896_0_0_0_2             | ..... UGGUGCAGGUCGGGA.....                                                                                                |
| Bn. sRNA5108898_0_1_0_0             | ..... UGGUGCAGGUCGGGAACUGAU.....                                                                                          |
| Bn. sRNA3948409_0_0_3_2             | ..... GGUGCAGGUCGGGA.....                                                                                                 |
| Bn. sRNA3948410_1_0_0_0             | ..... GGUGCAGGUCGGGAAC.....                                                                                               |
| Bn. sRNA3948411_1_0_0_0             | ..... GGUGCAGGUCGGGAACUGAUUGGCU.....                                                                                      |
| Bn. sRNA4631640_0_0_3_2             | ..... UCCGCCUUGUAUCAAGUGAAU.....                                                                                          |
| Bn. sRNA2727399_0_0_3_0             | ..... CCCGCCUUGUAUCAAGUGAA.....                                                                                           |
| Bn. sRNA2727400_1_0_9_5             | ..... CCCGCCUUGUAUCAAGUGAAU.....                                                                                          |
| Bn. sRNA2747584_0_1_0_0             | ..... CCGCCUUGUAUCAAGUGAAU.....                                                                                           |

AUGUUACGG C U C U A G-- G CC --| C  
 CGG CUC GA UCGCUUGGUGCAGG CCGGA CUGAUU GCU ACA GCCA CGUGG U  
 GCC GAG CU AGUGAACUAUGUUC GCCCU GGCUAG CGA UGU CGGU GUACC U  
 ----- U C A C A GGA G U- UG^ U

miRNA: Bn. sRNA4690491\_7043\_7044\_9958\_9512  
 miRNA\*: Bn. sRNA2727400\_1\_0\_9\_5



#####  
#####

Bna-miR169n

Bna-miR169n\_AC190048\_+\_65016\_65165 AGAAUUGCAUGAAGUGGAGUAGAGUAUAAUGCAGCCAAGGAUGACUUGCCGGAGGUGCUUCAUCAUGCAUAAUAAUUGGUGAUGAACAAUUCUGGCAAGUUGCCUUCGGCUACAUUUUGCUCUCUUCUACUCAUGCAAACUCUC  
Bn. sRNA5407548\_1\_0\_0\_0 ..... UUGCAUGAAGUGGAGUAGAGUA .....  
Bn. sRNA2066264\_0\_1\_0\_0 ..... AUGAAGUGGAGUAGAGUAUAAU .....  
Bn. sRNA4861168\_0\_0\_3\_0 ..... UGAAGUGGAGUAGAGUAUAAU .....  
Bn. sRNA4861169\_1\_1\_0\_0 ..... UGAAGUGGAGUAGAGUAUAAUG .....  
Bn. sRNA4861171\_0\_1\_0\_0 ..... UGAAGUGGAGUAGAGUAUAAUGC .....  
Bn. sRNA4861172\_0\_1\_0\_0 ..... UGAAGUGGAGUAGAGUAUAAUGCAG .....  
Bn. sRNA2109763\_1\_0\_0\_0 ..... AUGCAGCCAAGGAUGACUUGC .....  
Bn. sRNA2552062\_1\_2\_0\_0 ..... CAGCCAAGGAUGACUUGC .....  
Bn. sRNA2552065\_0\_3\_3\_8 ..... CAGCCAAGGAUGACUUGCCG .....  
Bn. sRNA2552068\_89\_42\_296\_183 ..... CAGCCAAGGAUGACUUGCCG .....  
Bn. sRNA1403024\_10\_6\_9\_5 ..... AGCCAAGGAUGACUUGCCG .....  
Bn. sRNA1403025\_2\_1\_6\_0 ..... AGCCAAGGAUGACUUGCCGA .....  
Bn. sRNA2679528\_0\_1\_0\_0 ..... CCAAGGAUGACUUGCCGGAG .....  
.....

AGAA--| A U U C - AU GGUC G UAAU  
UUGCAUGA GUGGAG AGAGUA AAUG AGCC AAGG GACUUGCCGGAG GUUCAUCAU CA \  
AACGUACU CAUCUU UCUCGU UUAC UCGG UUCC UUGAACGGUCUU CAAGUAGUG GU A  
CUCUCA^ - C U A C CG AAUA - UUAU

miRNA: Bn. sRNA2552068\_89\_42\_296\_183

Bna-miR169b

Bna-miR169b\_AC189369\_+\_97775\_97795 AGUGUGCAGCCAAGGAUGACUUGCCGAUUUGAAUUAUUUUUAAUACUUUACUUAAGACAUUUUCAGUUUCAAAUUUGUCUUGGAGAGGCUAGGAAGAAUUACAUAUUUUCGUUUUAAAAGAAAAAUUGAUGCCGCAAGUUUCCUUGGCUACAUGUU  
Bn. sRNA2552062\_1\_2\_0\_0 ..... CAGCCAAGGAUGACUUGC .....  
Bn. sRNA2552065\_0\_3\_3\_8 ..... CAGCCAAGGAUGACUUGCCG .....  
Bn. sRNA2552066\_12\_11\_49\_37 ..... CAGCCAAGGAUGACUUGCCGA .....  
Bn. sRNA1403023\_1\_0\_0\_0 ..... AGCCAAGGAUGACUUGCCGA .....  
.....

UG C U UGAAU AAUACUUUACUAAGACAUCUUUCAGUUUCAAAUUUGUCUUG  
AG UG AGCCAAGGA GACUUGCCGAUU AUUUUUU G  
UU AC UCGGUUCCU UUGAACGGCUAG UAUAAAAA A  
GU A U ----- -AGAAUUUGAUGCUUUUUUAACAUAUAAAGAAGGAUCGGAG

miRNA: Bn. sRNA2552066\_12\_11\_49\_37

Bna-miR169k

Bna-miR169k\_AC189356\_+133113\_133133 GUGUGGUAGCCAAGGAUGACUUGCCUGCGUCUUAAACACCAUAUCACAGACUUUAUCGAUAGUCUCUGAGUUGGUUAGGCGUAGGCAGUCUCCUCCGCUAUUCAGAC  
Bn. sRNA4396532\_3\_1\_0\_0 ..... UAGCCAAGGAUGACUUGCCUG .....  
.....

G -| A U U U AC UA C UUA  
GU UG GUAGCC AGGA GACU GCCUGCG CUUA ACCA UCA AGACU U  
CA AC UAUCGG UCCU CUGA CGGAUGU GGAU UGGU AGU UCUGA C  
G U^ C - - C -- UG C UAG

miRNA: Bn. sRNA4396532\_3\_1\_0\_0

#####  
#####

Bna-miR171b

Bna-miR171b\_CU695304\_+36506\_36620 GAUGUAAGGUAACGCGAGAUUUAGUGCGGUUCAAUCAAUAGUCGUGUUCACUUGAUAGAGAUCGGUUUUUGUUCGAUUGAGCCGUGCCAAUAUCACGCGUCAACCCAAAACG  
Bn. sRNA2839461\_1\_0\_3\_8 ..... CGAGAUUUUAGUGCGGUUCA .....  
Bn. sRNA1331648\_1\_0\_0\_0 ..... AGAUUUUAGUGCGGUUCA .....  
Bn. sRNA1331649\_0\_1\_0\_0 ..... AGAUUUUAGUGCGGUUCA .....  
Bn. sRNA1331651\_47\_64\_26\_52 ..... AGAUUUUAGUGCGGUUCA .....  
Bn. sRNA3546843\_5\_4\_0\_0 ..... GAUUAUAGUGCGGUUCA .....  
Bn. sRNA1915458\_0\_0\_3\_0 ..... AUUUUAGUGCGGUUCA .....  
Bn. sRNA5390683\_0\_0\_0\_2 ..... UUGAGCCGUGCCAAUAU .....  
Bn. sRNA5390684\_0\_0\_0\_2 ..... UUGAGCCGUGCCAAUAUC .....  
Bn. sRNA5390685\_0\_0\_0\_2 ..... UUGAGCCGUGCCAAUAUCA .....  
Bn. sRNA5390686\_0\_2\_3\_2 ..... UUGAGCCGUGCCAAUAUCAC .....  
Bn. sRNA5390687\_2\_2\_9\_8 ..... UUGAGCCGUGCCAAUAUCACG .....  
Bn. sRNA5390688\_0\_0\_0\_3 ..... UUGAGCCGUGCCAAUAUCACGC .....  
.....

GAUGUAA A-| A A UG A UCG U ACU  
GGU ACGCG GAUAAU G CGGUCAAUC AAUAG UG UCUC U  
CCA UGCGC CUAAUA C GCCGAGUUAG UUGUU GC AGAG G

GCAAAAC AC^ A C GU C UUG U AUA

miRNA Bn. sRNA5390687\_2\_2\_9\_8  
miRNA\* Bn. sRNA1331651\_47\_64\_26\_52

Bna-miR171f

Bna-miR171f\_AC189627\_-36069\_36184 AAAGAGUCCUUCUUGAUUUGGCCUGGUUCACUCAGAUUCUCCAGAUUACACACGUACUUAUUAUUAUUCUCAGUUAUCUGAUUGAGCCGCGCCAAUUCUCAGUGCUCUCUGU  
Bn. sRNA4509321\_5\_1\_3\_3 ..... UAUUGGCCUGGUUCACUCAGA .....  
Bn. sRNA5272971\_2\_4\_3\_0 ..... UUAUCUGAUUGAGCCGCGCCA .....  
Bn. sRNA4946449\_0\_0\_3\_0 ..... UGAUUGAGCCGCGCC .....  
Bn. sRNA4946450\_1\_1\_14\_3 ..... UGAUUGAGCCGCGCCAAUA .....  
Bn. sRNA4946452\_0\_1\_0\_0 ..... UGAUUGAGCCGCGCCAAUAU .....  
Bn. sRNA4946454\_39\_53\_261\_96 ..... UGAUUGAGCCGCGCCAAUAUC .....  
Bn. sRNA3611009\_0\_1\_6\_2 ..... GAUUGAGCCGCGCCAAUAUC .....  
Bn. sRNA4905022\_0\_0\_0\_2 ..... UGAGCCGCGCCAAUAUC .....

AA---| UC CUUU C C -- UCC UUACACACGU  
AGAG CU GAUUAUUGG UGGUUCU UCAGAU CU AGA \  
UCUC GA CUAUAACCG GCCGAGU AGUCUA GA UCU A  
UGCUC^ GU CU-- C U UU CUC UACAUUAUUC

miRNA: Bn. sRNA4509321\_5\_1\_3\_3  
miRNA\*: Bn. sRNA4946454\_39\_53\_261\_96

Bna-miR171e

Bna-miR171e\_AC189214\_-74594\_74574 ACAAUACGAGAUUUGGUGUGGUUCAAUACAGAAAACCACACUCUUUUGUUGUAGAGAUUCGGUUUGUUUGAUUGAGCCGUGCCAAUUAUCACGAGUGU  
Bn. sRNA5453531\_0\_1\_0\_0 ..... UUGUAGAGAUUCGGUUUGUUUGA .....  
Bn. sRNA4946478\_0\_0\_0\_2 ..... UGAUUGAGCCGUGCCAAUA .....  
Bn. sRNA4946479\_0\_2\_9\_3 ..... UGAUUGAGCCGUGCCAAUAUC .....  
Bn. sRNA5390683\_0\_0\_0\_2 ..... UUGAGCCGUGCCAAUAU .....  
Bn. sRNA5390684\_0\_0\_0\_2 ..... UUGAGCCGUGCCAAUAUC .....  
Bn. sRNA5390685\_0\_0\_0\_2 ..... UUGAGCCGUGCCAAUAUCA .....  
Bn. sRNA5390686\_0\_2\_3\_2 ..... UUGAGCCGUGCCAAUAUCAC .....  
Bn. sRNA5390687\_2\_2\_9\_8 ..... UUGAGCCGUGCCAAUAUCAG .....

AUA A UG - ACA UUU  
ACA CG GAUAUUGG UGGUCAAUCAGA AAACC CUCU G  
UGU GC CUAUAACC GCCGAGUUAGUUU UUUGG GAGA U  
GA- A GU G CUA UGU

miRNA: Bn. sRNA4946479\_0\_2\_9\_3

#####  
#####

Bna-miR172d

Bna-miR172d\_AC189487+\_133692\_133804 UUUUUGCUAUUGCAUCAUCAAGAUAUCAGAAAUCAUAUUCUUGAUGGGUUCUCCUUCGAGCCUGUCUUUUUUGGUUUGAGAAUCUUGAUGAUGCUGCAGCGGCGAUUAAA  
Bn. sRNA3664360\_1\_0\_3\_0 ..... GCAUCAUCAUCAAGAUUCAG .....  
Bn. sRNA3664361\_0\_1\_0\_2 ..... GCAUCAUCAUCAAGAUUCAGA .....  
Bn. sRNA4894667\_0\_0\_3\_0 ..... UGAGAAUCUUGAUGAUGCUGCA .....  
Bn. sRNA4894668\_0\_3\_0\_5 ..... UGAGAAUCUUGAUGAUGCUGCAG .....  
Bn. sRNA3427075\_0\_0\_0\_2 ..... GAGAAUCUUGAUGAUGCUGC .....  
Bn. sRNA3427076\_22\_22\_66\_95 ..... GAGAAUCUUGAUGAUGCUGCA .....  
Bn. sRNA1198446\_0\_0\_3\_2 ..... AGAAUCUUGAUGAUGC .....  
Bn. sRNA1198459\_1\_1\_0\_2 ..... AGAAUCUUGAUGAUGCU .....  
Bn. sRNA1198470\_1\_3\_3\_3 ..... AGAAUCUUGAUGAUGCUG .....  
Bn. sRNA1198479\_4\_1\_26\_15 ..... AGAAUCUUGAUGAUGCUGC .....  
Bn. sRNA1198480\_31\_21\_141\_103 ..... AGAAUCUUGAUGAUGCUGCA .....  
Bn. sRNA1198483\_913\_713\_3761\_4455 ..... AGAAUCUUGAUGAUGCUGCAG .....  
Bn. sRNA3344683\_1\_3\_0\_0 ..... GAAUCUUGAUGAUGCUGCA .....  
Bn. sRNA3344685\_23\_34\_0\_0 ..... GAAUCUUGAUGAUGCUGCAG .....  
Bn. sRNA4813769\_0\_0\_3\_0 ..... UCUUGAUGAUGCUGCA .....  
Bn. sRNA3194496\_0\_1\_11\_0 ..... CUUGAUGAUGCUGCAG .....  
Bn. sRNA5398762\_0\_0\_0\_2 ..... UUGAUGAUGCUGCAG .....

UUU--| UA U AG UAUCCUU UC  
UUGC UUGCA CAUCAUCAAGAUUC AAAUCA GAUGGGUUC C  
AGCG GACGU GUAGUAGUUCUAAG UUUGGU CUGUCCGAG U  
AAAUU^ GC C AG UUUUU-- CU

miRNA: Bn. sRNA1198483\_913\_713\_3761\_4455  
miRNA\*: Bn. sRNA3664361\_0\_1\_0\_2

Bna-miR172b

```

Bna-miR172b_AC189648_-_23979_24073      UAGUUGCAGAUUGCAGCAUCAUUAAGAUAACAAGAGAUUGGUUUUCUUGUUUCUCGCCUCUUGGAAUCUUGAUGAUGCUGCAUCAGCAACUA
Bn. sRNA4960976_0_0_3_0                  ..... UGCAGCAUCAUUAAGAUAACAC .....
Bn. sRNA3651609_3_1_14_12                 ..... GCAGCAUCAUUAAGAUAACA .....
Bn. sRNA5436372_1_0_0_0                   ..... UUGGAAUCUUGAUGAUGCUGCA .....
Bn. sRNA5436373_15_17_20_34               ..... UUGGAAUCUUGAUGAUGCUGCA .....
Bn. sRNA5072730_2_0_3_0                   ..... UGGAAUCUUGAUGAUGCUGC .....
Bn. sRNA5072731_5_6_3_0                   ..... UGGAAUCUUGAUGAUGCUGCA .....
Bn. sRNA3868937_0_2_0_0                   ..... GGGAAUCUUGAUGAUGCUGCA .....
Bn. sRNA3868939_23_24_11_32               ..... GGGAAUCUUGAUGAUGCUGCA .....
Bn. sRNA3785704_1_1_6_5                   ..... GGAUCUUGAUGAUGCUGCA .....
Bn. sRNA3785707_178_118_373_433          ..... GGAUCUUGAUGAUGCUGCA .....
Bn. sRNA3344683_1_3_0_0                   ..... GAAUCUUGAUGAUGCUGCA .....
Bn. sRNA3344687_356_250_0_7               ..... GAAUCUUGAUGAUGCUGCA .....
Bn. sRNA710791_0_0_6_3                    ..... AAUCUUGAUGAUGCUGCA .....
Bn. sRNA2047687_1_2_3_0                   ..... AUCUUGAUGAUGCUGCA .....
Bn. sRNA4813769_0_0_3_0                   ..... UCUUGAUGAUGCUGCA .....
Bn. sRNA4813773_0_0_3_0                   ..... UCUUGAUGAUGCUGCA .....
Bn. sRNA3194499_0_0_9_0                   ..... CUUGAUGAUGCUGCA .....
Bn. sRNA5398764_3_0_9_2                   ..... UUGAUGAUGCUGCA .....

```

```

      A           A   A U UUUUC
UAGUUGC GAUGCAGCAUCAUUAAGAUAACAAGAG UG GG \
AUCAACG CUACGUCGUAGUAGUUCUAAG GUUCUC GC CU U
      A           G   C U UUUGU

```

miRNA: Bn. sRNA3785707\_178\_118\_373\_433  
miRNA\*: Bn. sRNA3651609\_3\_1\_14\_12

Bna-miR172c

```

Bna-miR172c_AC189559_-_129994_130131    CAGCCGGUAGUUGCAGAUUGCAGCAUCAUUAAGAUAACAAGAGUUGGUUUUCUUGUUUCGCCUCUCCAUCCGAAAACAAAGGUUCUUCGAAUGGAAUCUUGAUGAUGCUGCAUCAGCAUAUACAUGGCCUA
Bn. sRNA3651598_1_0_3_0                  ..... GCAGCAUCAUUAAGAUAACAC .....
Bn. sRNA3651599_4_1_9_3                 ..... GCAGCAUCAUUAAGAUAACA .....
Bn. sRNA743206_0_0_3_0                   ..... AAUGGAAUCUUGAUGAUGCUGCA .....
Bn. sRNA2161127_2_1_0_2                   ..... AUGGAAUCUUGAUGAUGCUGCA .....
Bn. sRNA5072730_2_0_3_0                   ..... UGGAAUCUUGAUGAUGCUGC .....
Bn. sRNA5072731_5_6_3_0                   ..... UGGAAUCUUGAUGAUGCUGCA .....
Bn. sRNA3868937_0_2_0_0                   ..... GGGAAUCUUGAUGAUGCUGCA .....
Bn. sRNA3868939_23_24_11_32               ..... GGGAAUCUUGAUGAUGCUGCA .....
Bn. sRNA3785704_1_1_6_5                   ..... GGAUCUUGAUGAUGCUGCA .....
Bn. sRNA3785707_178_118_373_433          ..... GGAUCUUGAUGAUGCUGCA .....
Bn. sRNA3344683_1_3_0_0                   ..... GAAUCUUGAUGAUGCUGCA .....
Bn. sRNA3344687_356_250_0_7               ..... GAAUCUUGAUGAUGCUGCA .....
Bn. sRNA710791_0_0_6_3                    ..... AAUCUUGAUGAUGCUGCA .....
Bn. sRNA2047687_1_2_3_0                   ..... AUCUUGAUGAUGCUGCA .....
Bn. sRNA4813769_0_0_3_0                   ..... UCUUGAUGAUGCUGCA .....
Bn. sRNA4813773_0_0_3_0                   ..... UCUUGAUGAUGCUGCA .....
Bn. sRNA3194499_0_0_9_0                   ..... CUUGAUGAUGCUGCA .....
Bn. sRNA5398764_3_0_9_2                   ..... UUGAUGAUGCUGCA .....

```

```

C  -| GU A           A AG A U UU G CCUC
AGCCG GUA UGC GAUGCAGCAUCAUUAAGAUAACA UGA G GG UCCUU GUUUUCG U
UCGGU CAU ACG CUACGUCGUAGUAGUUCUAAG GU GCU C UC GGGAA CAAAAGC C
A  A^ AU A           G AA - U UU A CUAC

```

miRNA: Bn. sRNA3785707\_178\_118\_373\_433  
miRNA\*: Bn. sRNA3651599\_4\_1\_9\_3

Bna-miR172a

Bna-miR172a\_AC189388\_-19381\_19490 UUUUGUAGGCGCAGCACCAUCAAGAUUCACAUGGAAAUUGAAAAUCUCCUAAUUUUAAUUAGGGUUUGAUUUGAUUAGAGAAUCUUGAUGAUGCUGCAUCAACAAC

Bn. sRNA3650968\_1\_0\_0\_0 ..... GCAGCACCAUCAAGAUUCAC. ....

Bn. sRNA3650971\_0\_1\_0\_0 ..... GCAGCACCAUCAAGAUUCACAU. ....

Bn. sRNA1381797\_2\_0\_0\_0 ..... AGCACCAUCAAGAUUCACA. ....

Bn. sRNA2080993\_9\_2\_6\_12 ..... AUGAGAAUCUUGAUGAUGCUGCAU. ....

Bn. sRNA4894667\_0\_0\_3\_0 ..... UGAGAAUCUUGAUGAUGCUGCA. ....

Bn. sRNA4894669\_1\_1\_9\_0 ..... UGAGAAUCUUGAUGAUGCUGCAU. ....

Bn. sRNA3427075\_0\_0\_0\_2 ..... GAGAAUCUUGAUGAUGCUGC. ....

Bn. sRNA3427076\_22\_22\_66\_95 ..... GAGAAUCUUGAUGAUGCUGCA. ....

Bn. sRNA3427077\_16\_5\_20\_14 ..... GAGAAUCUUGAUGAUGCUGCAU. ....

Bn. sRNA1198446\_0\_0\_3\_2 ..... AGAAUCUUGAUGAUGC. ....

Bn. sRNA1198459\_1\_1\_0\_2 ..... AGAAUCUUGAUGAUGCU. ....

Bn. sRNA1198470\_1\_3\_3\_3 ..... AGAAUCUUGAUGAUGCUG. ....

Bn. sRNA1198479\_4\_1\_26\_15 ..... AGAAUCUUGAUGAUGCUGC. ....

Bn. sRNA1198480\_31\_21\_141\_103 ..... AGAAUCUUGAUGAUGCUGCA. ....

Bn. sRNA1198493\_4272\_3077\_5337\_6403 ..... AGAAUCUUGAUGAUGCUGCAU. ....

Bn. sRNA3344683\_1\_3\_0\_0 ..... GAAUCUUGAUGAUGCUGCA. ....

Bn. sRNA3344687\_356\_250\_0\_7 ..... GAAUCUUGAUGAUGCUGCAU. ....

Bn. sRNA710791\_0\_0\_6\_3 ..... AAUCUUGAUGAUGCUGCAU. ....

Bn. sRNA710792\_0\_1\_0\_0 ..... AAUCUUGAUGAUGCUGCAUCAACA. ..

Bn. sRNA2047687\_1\_2\_3\_0 ..... AUCUUGAUGAUGCUGCAU. ....

Bn. sRNA4813769\_0\_0\_3\_0 ..... UCUUGAUGAUGCUGCA. ....

Bn. sRNA4813773\_0\_0\_3\_0 ..... UCUUGAUGAUGCUGCAU. ....

Bn. sRNA3194499\_0\_0\_9\_0 ..... CUUGAUGAUGCUGCAU. ....

Bn. sRNA5398764\_3\_0\_9\_2 ..... UUGAUGAUGCUGCAU. ....

UU A GC C A GAA--| UG AAUC U  
 UUGU G GCAGCA CAUCAAGAUUC CAUG AU AAA UCCUAAUU \  
 AACA C CGUCGU GUAGUUCUAAG GUAU UA UUU GGGAUAA U  
 C- A UA A A AUGUA^ GU ---- U

miRNA: Bn. sRNA1198493\_4272\_3077\_5337\_6403  
 miRNA\*: Bn. sRNA3650969\_9\_14\_20\_12

#####  
 #####

Bna-miR390b

Bna-miR390b\_AC189543+\_98823\_98913 GAAUCUGUAAAGCUCAGGAGGGAUAGCGCAUCAUGAUCACACACAUUGAUUUUUUGGCGCUGUCCAUCCUGAGUUUCAUUGGCUCUUCU

Bn. sRNA709162\_1\_0\_0\_0 . AAUCUGUAAAGCUCAGGAGGGA. ....

Bn. sRNA201149\_1\_0\_0\_0 ..... AAAGCUCAGGAGGGAUAG. ....

Bn. sRNA201150\_5\_4\_0\_5 ..... AAAGCUCAGGAGGGAUAGCGC. ....

Bn. sRNA201151\_3\_1\_3\_2 ..... AAAGCUCAGGAGGGAUAGCGCC. ....

Bn. sRNA201152\_0\_1\_0\_0 ..... AAAGCUCAGGAGGGAUAGCGCAU. ....

Bn. sRNA529219\_1\_2\_0\_0 ..... AAGCUCAGGAGGGAUAGC. ....

Bn. sRNA529222\_6\_2\_0\_2 ..... AAGCUCAGGAGGGAUAGCG. ....

Bn. sRNA529224\_5\_1\_3\_5 ..... AAGCUCAGGAGGGAUAGCGC. ....

Bn. sRNA529226\_763\_402\_428\_189 ..... AAGCUCAGGAGGGAUAGCGCC. ....

Bn. sRNA529227\_0\_3\_0\_2 ..... AAGCUCAGGAGGGAUAGCGCCA. ....

Bn. sRNA529228\_1\_1\_0\_0 ..... AAGCUCAGGAGGGAUAGCGCCAUC. ....

Bn. sRNA1438013\_1\_1\_0\_0 ..... AGCUCAGGAGGGAUAGC. ....

Bn. sRNA1438016\_27\_13\_6\_2 ..... AGCUCAGGAGGGAUAGCGCC. ....

Bn. sRNA1438017\_0\_0\_0\_2 ..... AGCUCAGGAGGGAUAGCGCCA. ....

Bn. sRNA3734586\_0\_1\_0\_0 ..... GCUCAGGAGGGAUAGCGCC. ....

Bn. sRNA4576765\_0\_1\_0\_0 ..... UCAGGAGGGAUAGCGCC. ....

Bn. sRNA1507187\_1\_1\_3\_0 ..... AGGAGGGAUAGCGCC. ....

Bn. sRNA2889590\_1\_0\_0\_0 ..... CGCUGUCCAUCUGAGUUUC. ....

Bn. sRNA2889591\_20\_7\_37\_17 ..... CGCUGUCCAUCUGAGUUUCA. ....

Bn. sRNA3753733\_1\_2\_0\_0 ..... GCUGUCCAUCUGAGUUUCA. ....

----| AU U A G UCAUG ACAC  
 GA C GU AAGCUCAGGA GGUAAGCGCCA AUC \  
 CU G UA UUUGAGUCCU CCUGUCGCGGU UAG A  
 UCUU^ CG U C A UUUUA CUAC

miRNA: Bn. sRNA529226\_763\_402\_428\_189  
 miRNA\*: Bn. sRNA2889591\_20\_7\_37\_17

#####  
#####

Bna-miR394a

Bna-miR394a\_AC189318+\_31776\_31891 ACAGAGUUCUUUGGCAUUCUGUCCACCUCCUUCUGAAUAUAUUUGUGUAUAAGUGUACGCAACUACGUUGUGUUUGUGAGGAGGUGGGCAUACUGCCAAUAGAGAUCUGUUA  
Bn. sRNA5554189\_0\_0\_2 ..... UUUGGCAUUCUGUCCACCUC.....  
Bn. sRNA5554190\_2\_2\_20\_8 ..... UUUGGCAUUCUGUCCACCUC.....  
Bn. sRNA5433222\_20\_12\_109\_69 ..... UUUGGCAUUCUGUCCACCUC.....  
Bn. sRNA5060025\_2\_2\_0\_3 ..... UGGCAUUCUGUCCACCUC.....  
Bn. sRNA1613410\_4\_2\_17\_5 ..... AGGUGGGCAUACUGCCAAUAG.....  
Bn. sRNA1613411\_2\_0\_0\_3 ..... AGGUGGGCAUACUGCCAAUAGA.....

-- G - UUC UCU-- U----| A  
ACAGA UUCU UUGGCA UGUCCACCUCCU GAAUAUA UUUGUAU A  
UGUCU GAGA AACCGU ACGGGUGGAGGAG UUUGUGU AACGCAUG G  
AU A U CAU UGUGU UGCAUC^ U

miRNA: Bn. sRNA5433222\_20\_12\_109\_69  
miRNA\*: Bn. sRNA1613410\_4\_2\_17\_5

Bna-miR394b

Bna-miR394b\_AC189295+\_85927\_86038 UUACAGAGAUCUUUGGCAUUCUGUCCACCUCCUACCUAUGUAUAUGUGUAUAUUCUACGUUGUGUUUGUGAGGGGGAGGUGGGCAUACUGCCAACAGAGAUCUGUUAGG  
Bn. sRNA5227373\_0\_1\_0\_0 UUACAGAGAUCUUUGGCAUUC.....  
Bn. sRNA5554189\_0\_0\_0 ..... UUUGGCAUUCUGUCCACCUC.....  
Bn. sRNA5554190\_2\_2\_20\_8 ..... UUUGGCAUUCUGUCCACCUC.....  
Bn. sRNA5433222\_20\_12\_109\_69 ..... UUUGGCAUUCUGUCCACCUC.....  
Bn. sRNA5060025\_2\_2\_0\_3 ..... UGGCAUUCUGUCCACCUC.....  
Bn. sRNA1613406\_1\_0\_17\_14 ..... AGGUGGGCAUACUGCCAACAG.....  
Bn. sRNA3954593\_1\_0\_0\_0 ..... GGUGGGCAUACUGCCAACAG.....

UU-- GA - UUC -- CU-|UG U UAU  
ACAGA UCU UUGGCA UGUCCACCUCCU AC A UA AUGUG \  
UGUCU AGA AACCGU ACGGGUGGAGGGG UG U GU UGCAU U  
GGAU AG C CAU AG UUU^GU - CUA

miRNA: Bn. sRNA5433222\_20\_12\_109\_69  
miRNA\*: Bn. sRNA1613406\_1\_0\_17\_14

#####  
#####

Bna-miR395a

Bna-miR395a\_AC189385+\_28837\_28857 UCCUAGAGUUCUUCUGAGCACUUCUUAUGGGUAUACAAUUUCUUAUGAAGAUUACCCACUGAAGUGUUUGGGGAACUCCUGGA  
Bn. sRNA4167365\_0\_1\_0\_0 ..... GUUCCUCUGAGCACUUCUUAUG.....  
Bn. sRNA3100373\_1\_3\_0\_0 ..... CUGAAGUGUUUGGGG.....  
Bn. sRNA3100374\_0\_1\_0\_0 ..... CUGAAGUGUUUGGGGA.....  
Bn. sRNA3100375\_1\_0\_0\_0 ..... CUGAAGUGUUUGGGGAA.....  
Bn. sRNA3100376\_2\_2\_6\_2 ..... CUGAAGUGUUUGGGGAACUC.....

UA UG U UACAA U  
UCC GAGUCCUC AGCACUUCU UGGGUA UUUC U  
AGG CUCAAGGGG UUGUGAAGU ACCCAU GAAG A  
UC GU C UA--- U

miRNA: Bn. sRNA3100376\_2\_2\_6\_2  
miRNA\*: Bn. sRNA4167365\_0\_1\_0\_0

Bna-miR395b

Bna-miR395b\_AC232511\_-17070\_17050 UCCUAGAGUUCUUCUGAGCACUUCUUAUGGAGAUACCAUUUUUUUAUCAAAAUGUAUCCACUGAAGUGUUUGGGGAACUCCUGGA  
Bn. sRNA4167365\_0\_1\_0\_0 ..... GUUCCUCUGAGCACUUCUUAUG.....  
Bn. sRNA3100373\_1\_3\_0\_0 ..... CUGAAGUGUUUGGGG.....  
Bn. sRNA3100374\_0\_1\_0\_0 ..... CUGAAGUGUUUGGGGA.....  
Bn. sRNA3100375\_1\_0\_0\_0 ..... CUGAAGUGUUUGGGGAA.....  
Bn. sRNA3100376\_2\_2\_6\_2 ..... CUGAAGUGUUUGGGGAACUC.....

UA UG U A C AUUUU  
UCC GAGUCCUC AGCACUUCU UGGGUA UAC AUUU \  
AGG CUCAAGGGG UUGUGAAGU ACCCU AUG UAAA C  
UC GU C - - ACUAU



#####  
#####

Bna-miR397b

Bna-miR397a\_AC189186\_-40041\_40151 UUGCACGAACAUCUAUGAGUGCAGCGUUGAUGUGAUUUACUUAUCUUUUUCAUUGUUGAAUGGUAUAAAGCAAUUACAUCAACGUUGGCUCAAUUAUGUUUUUCUGAUUU  
Bn. sRNA2617882\_0\_1\_0\_8 ..... CAUCAUUGAGUGCAGCGUUGAU.....  
Bn. sRNA1969904\_3\_2\_3\_10 ..... AUCAUUGAGUGCAGCGUUGAUG.....  
Bn. sRNA1969905\_0\_0\_0\_2 ..... AUCAUUGAGUGCAGCGUUGAUG.....  
Bn. sRNA4604963\_1\_0\_0\_0 ..... UCAUUGAGUGCAGCGUUGA.....  
Bn. sRNA4604964\_0\_0\_0\_2 ..... UCAUUGAGUGCAGCGUUGAU.....  
Bn. sRNA4604966\_6\_4\_9\_12 ..... UCAUUGAGUGCAGCGUUGAUG.....  
Bn. sRNA4604969\_151\_170\_89\_215 ..... UCAUUGAGUGCAGCGUUGAUG.....  
Bn. sRNA2659635\_4\_6\_0\_0 ..... CAUUGAGUGCAGCGUUGAUG.....  
Bn. sRNA2286150\_0\_1\_0\_0 ..... AUUGAGUGCAGCGUUGAUG.....  
Bn. sRNA2612688\_0\_1\_0\_0 ..... CAUCAACGUUGGCUCAA.....

UUGCAC--- C G U A --| UU U  
GAACAU AUUGAGU CAGCGUUGAUGUGA UU CUU AUCU UUCA U  
UUUGUA UAACUCG GUUGCAACUACA AU AA GAA UAGG AAGU G  
UUUAGUCUU U - U C AU^ U- U

miRNA: Bn. sRNA4604969\_151\_170\_89\_215  
miRNA\*: Bn. sRNA2612688\_0\_1\_0\_0

#####  
#####

Bna-miR399b

Bna-miR399b\_AC189240\_+94436\_94456 AUUACAGGGCAAGAUCUCUAUUGGCAGGAAACCAUUAUCUUGACCUUUGCAUCUCUUUAUGCAUUGUUUGUAGUGAGUUCUCUGCCAAAGGAGAUUUGCCCGUAUU  
Bn. sRNA3888521\_1\_0\_0\_0 ..... GGGCAAGAUCUCUAUUGGCAGG.....  
Bn. sRNA3888523\_1\_3\_0\_3 ..... GGGCAAGAUCUCUAUUGGCAGG.....  
Bn. sRNA3888524\_0\_1\_0\_0 ..... GGGCAAGAUCUCUAUUGGCAGG.....  
Bn. sRNA3838029\_0\_1\_0\_0 ..... GGCAAGAUCUCUAUUGGCAGG.....  
Bn. sRNA4968691\_0\_1\_0\_0 ..... UGCCAAAGGAGAUUUGCCC.....  
Bn. sRNA4968694\_13\_20\_26\_44 ..... UGCCAAAGGAGAUUUGCCCGG....  
Bn. sRNA3672671\_1\_1\_0\_0 ..... GCCAAAGGAGAUUUGCCCGG....  
Bn. sRNA2379195\_1\_0\_0\_0 ..... CAAAGGAGAUUUGCCCGG....  
Bn. sRNA2379197\_1\_1\_3\_0 ..... CAAAGGAGAUUUGCCCGG....  
Bn. sRNA2379198\_0\_1\_0\_0 ..... CAAAGGAGAUUUGCCCGGU....

A A A GA - UU CUU CU  
AUUAC GGGCA GAUCUCU UUGGCAG AAC CAUAC GAC UGCAU C  
UAAUG CCCGU UUAGAGG AACCGUC UUG GUGAUG UUG ACGUA U  
G - A UC A UU UU- UU

miRNA: Bn. sRNA4968694\_13\_20\_26\_44  
miRNA\*: Bn. sRNA3888523\_1\_3\_0\_3

Bna-miR399c

Bna-miR399c\_AC232488\_+116624\_116644 AUUACAGGGCAAGAUCUCCUUGGCAGGAAUCUUAUUAUCUUCAGUCUUAUCAUUGCAUUAUUGUUUGGGCGAGCUCUCUGCCAAAGGAGAUUUGCCCGUAUU  
Bn. sRNA4968700\_11\_14\_11\_58 ..... UGCCAAAGGAGAUUUGCCCGG....  
Bn. sRNA4968702\_0\_0\_0\_2 ..... UGCCAAAGGAGAUUUGCCCGU....  
Bn. sRNA2379200\_0\_0\_0\_5 ..... CAAAGGAGAUUUGCCCGG....  
Bn. sRNA2379201\_0\_0\_0\_2 ..... CAAAGGAGAUUUGCCCGUA....

A A - A-| UAUUACUUA UU-- G  
AUUAC GGC AGAUCUCCUUGGCAG GA UC GUC ACAUUAU C  
UAAUG CCUG UUUAGAGGAAACCGUC CU AG CGG UGUUAU A  
G - U CG^ ----- UGUU U

miRNA: Bn. sRNA4968700\_11\_14\_11\_58

#####  
#####

Bna-miR403

```
Bna-miR403a_AC189416_-_88119_88229      AGAGAAGAGUCAUUACAUGUUUUGUGCGUGAAUCUAAUUCGUAUGCUCAUGUAGUAAUCCUAUCUUGUUGGUAUAGAUUCACGCACAAACUCGUAACUGUCUUUU
Bn. sRNA4500302_0_1_0_0                  ..... UAUUACAUGUUUUGUGCG.....
Bn. sRNA4500303_8_7_20_19                ..... UAUUACAUGUUUUGUGCGUGAA.....
Bn. sRNA5200925_0_0_0_2                  ..... UGUUUUGUGCGUGAA.....
Bn. sRNA5200926_0_0_3_0                  ..... UGUUUUGUGCGUGAAUCUAAU.....
Bn. sRNA5200927_0_1_9_3                  ..... UGUUUUGUGCGUGAAUCUAAU.....
Bn. sRNA2236416_0_0_0_2                  ..... AUUAGAUUCACGCACAAACUCG.....
Bn. sRNA5249190_0_0_3_0                  ..... UUAGAUUCACGCACA.....
Bn. sRNA5249191_0_0_0_2                  ..... UUAGAUUCACGCACA.....
Bn. sRNA5249192_1_1_20_5                  ..... UUAGAUUCACGCACAAA.....
Bn. sRNA5249195_2_3_3_8                  ..... UUAGAUUCACGCACAAAC.....
Bn. sRNA5249196_21_18_0_3                ..... UUAGAUUCACGCACAAACU.....
Bn. sRNA5249198_3_3_0_3                  ..... UUAGAUUCACGCACAAACUC.....
Bn. sRNA5249200_85_71_238_259           ..... UUAGAUUCACGCACAAACUCG.....
Bn. sRNA4391162_0_0_0_2                  ..... UAGAUUCACGCACAAAC.....
Bn. sRNA4391163_2_1_6_0                  ..... UAGAUUCACGCACAAACUCG.....
Bn. sRNA1359813_0_0_6_0                  ..... AGAUUCACGCACAAACUCG.....
Bn. sRNA2255417_0_0_9_3                  ..... AUUCACGCACAAACUCGUAA.....
Bn. sRNA2255419_0_0_6_3                  ..... AUUCACGCACAAACUCGUAAU.....
Bn. sRNA5295516_0_1_0_0                  ..... UUCACGCACAAACUCGUAA.....
```

```
AGAG|   U U   AU   U           UAU UCAU  UA
AAGAG CA AUUAC GUUU GUGCGUGAAUCUAAUUCG GC  GUAG \
UUUUC GU UAAUG CAAA CACGCACUUAGAUUAGGU  UG  UAUC A
----^   U C   CU   -           UGU UUC-  CU
```

miRNA: Bn. sRNA5249200\_85\_71\_238\_259  
miRNA\*: Bn. sRNA5200927\_0\_1\_9\_3

#####  
#####

Bna-miR860

```
Bna-miR860a_UC87297+_516_630            UGGUCAAGUGAAUGUAGUAGUCCAUCUAAUUGAAGUACUAGCACACCAUCUCUAGUGAGAUGUGGUUGAGUAGUCAAUACAUGGACUACAUUAUUACUUUUGAUCAA
Bn. sRNA2187203_0_0_0_2                  ..... AUGUAGUCCAUCUAAUUGAAG.....
Bn. sRNA4540940_2_2_3_0                  ..... UCAAUACAUGGACUACAUAU.....
Bn. sRNA2446224_0_0_3_0                  ..... CAAUACAUGGACUACAUAUAU.....
Bn. sRNA904250_0_0_0_3                  ..... ACAUUGGACUACAUAUAUAC.....
Bn. sRNA1041726_1_0_0_0                  ..... ACUACAUAUAUUACUUUUGAUCAA
```

```
-      U           C   G   AG--|  C   U
UGGUCAAG GAAUGUAUGUAGUCCAUAUUGAAGUACUAGCACACCAUCUCUAGUGAGAUGUGGUUGAGUAGUCAAUACAUGGACUACAUUAUUACUUUUGAUCAA
ACUAGUUU CAUUAUAUACAUCAGGUUA AUAACUU AUGA  GUGU GUAGAG G
A      U           C   G   GUUG^  A   U
```

miRNA: Bn. sRNA4540940\_2\_2\_3\_0  
miRNA\*: Bn. sRNA2187203\_0\_0\_0\_2



#####  
#####

Bna-miR1140

```
Bna-miR1140_AC189528_-_3017_2997      UAUGGCUCCGAUUGGCUUAGGCUGUUGUGGCUUUGACUUCUUUCUAAAGUCUCAAUUUUAGUUUUACAUAUCAGUAAUUUUUUAAAAGUCACAGCCACAACAGCCUAAACCAAUCGGAGCCAUG
Bn. sRNA3736137_0_0_3_3                .... GCUCCGAUUGGCUUAGGCUG. ....
Bn. sRNA3736139_1_0_0_0                .... GCUCCGAUUGGCUUAGGCUGU. ....
Bn. sRNA4639687_1_1_0_0                .... UCCGAUUGGCUUAGGCU. ....
Bn. sRNA4639692_0_3_0_0                .... UCCGAUUGGCUUAGGCUGUU. ....
Bn. sRNA4639693_0_1_3_7                .... UCCGAUUGGCUUAGGCUGUUG. ....
Bn. sRNA2745231_0_0_0_2                .... CCGAUUGGCUUAGGC. ....
Bn. sRNA2745240_0_1_0_0                .... CCGAUUGGCUUAGGCUGUU. ....
Bn. sRNA2745241_0_0_6_2                .... CCGAUUGGCUUAGGCUGUUG. ....
Bn. sRNA2745242_1_5_6_10              ..... CCGAUUGGCUUAGGCUGUUGU. ....
Bn. sRNA1654747_0_0_6_0                ..... AGUCACAGCCACAACAGCCUA. ....
Bn. sRNA807778_2_1_3_0                ..... ACAACAGCCUAAACCAUCGG. ....
Bn. sRNA2394484_2_3_0_2                ..... CAACAGCCUAAACCAUCGGA. ....
Bn. sRNA2394485_0_0_6_0                ..... CAACAGCCUAAACCAUCGGAG. ....
Bn. sRNA314359_2_0_0_3                ..... AACAGCCUAAACCAUCGGA. ....
Bn. sRNA314363_62_56_405_381          ..... AACAGCCUAAACCAUCGGAG. ....
Bn. sRNA866675_0_0_0_2                ..... ACAGCCUAAACCAUCGG. ....
Bn. sRNA866676_1_0_0_2                ..... ACAGCCUAAACCAUCGGA. ....
Bn. sRNA866679_54_41_342_425          ..... ACAGCCUAAACCAUCGGAG. ....
Bn. sRNA866682_10_13_66_162           ..... ACAGCCUAAACCAUCGGAGC. ....
Bn. sRNA2553259_2_0_0_0                ..... CAGCCUAAACCAUCGGAG. ....
Bn. sRNA2553260_0_2_0_0                ..... CAGCCUAAACCAUCGGAGC. ....
Bn. sRNA2553261_0_0_3_0                ..... CAGCCUAAACCAUCGGAGCC. ....
Bn. sRNA3687716_4_2_11_3              ..... GCCUAAACCAUCGGAGCCA. ....
Bn. sRNA2993109_0_0_3_0                ..... CUAACCAUCGGAG. ....
Bn. sRNA133415_0_0_0_2                ..... AAACCAUCGGAGCCA. ....
```

```
          C          U      CUUUCUAAAGUCUCAAUUUUAGUU
UAUGGCUCCGAUUGG UUUAGGCUGUUGGCU UGACUU      U
GUACCGAGGCUAACC AAUCCGACAACACCGA ACUGAA      U
          -          C      -AAUUUUUUAAAUUGCACUAACACU
```

miRNA: Bn. sRNA314363\_62\_56\_405\_381  
miRNA\*: Bn. sRNA2745242\_1\_5\_6\_10

#####  
#####

Bna-miR2111a

```
Bna-miR2111a_AC189646_-_137286_137397  GUGAAGAACUGGUAUUCUGCAUCCUGAGGUUUAAAAUUUAUAGGCAAUUAAAACAUAGCAAUUGUGUAUGGUUUUUUAAUCCUGGGAUACGGAUUACCUUCCUUACU
Bn. sRNA404730_1_0_0_0                ..... AACUGGUAUUCUGCAUCCUGA. ....
Bn. sRNA4297514_2_1_0_0                ..... UAAUCUGCAUCCUGAGGUU. ....
Bn. sRNA4297516_0_1_0_0                ..... UAAUCUGCAUCCUGAGGUU. ....
Bn. sRNA4297517_59_149_3_10           ..... UAAUCUGCAUCCUGAGGUUA. ....
Bn. sRNA708190_0_2_0_0                ..... AAUCUGCAUCCUGAGGUUA. ....
Bn. sRNA5220714_0_1_0_0                ..... UUAUCCUGGGAUACGGAUU. ....
Bn. sRNA4296162_0_1_0_0                ..... UAAUCCUGGGAUACGGAUU. ....
Bn. sRNA1990062_1_0_0_0                ..... AUCCUGGGAUACGGAUUA. ....
Bn. sRNA1990065_11_34_32_56           ..... AUCCUGGGAUACGGAUUACC. ....
Bn. sRNA3074273_0_0_0_2                ..... CUCGGAUACGGAUUACC. ....
Bn. sRNA3882335_0_0_0_2                ..... GGGAUACGGAUUACC. ....
```

```
-| A CU      C      U      U      G AAUAAA      G
GUGA GAA GGUAUUCUG AUCCUGAGG UUA AAAA UUAUA GC      ACAU C
CAUU CUU CCAUUAGGC UAGGGCUCC AAUUUUU GGUAU UG      UGUA A
U^ C CU      A      U      U      G ----- A
```

miRNA: Bn. sRNA4297517\_59\_149\_3\_10  
miRNA\*: Bn. sRNA1990065\_11\_34\_32\_56

Bna-miR2111d

Bna-miR2111d\_AC189208\_+\_23574\_23683      AGGACCGGGUAAUCUGCAUCCUGAGGUUUAAAGCUUGAUUUACGCAUAAACAUGCCGACGCAUUAACUAUGUGUUUUAGAAUAGCUUUUAGUCCUCGGGAUGCGGAUUA  
 Bn. sRNA4297514\_2\_1\_0\_0      ..... UAAUCUGCAUCCUGAGGUU.....  
 Bn. sRNA4297516\_0\_1\_0\_0      ..... UAAUCUGCAUCCUGAGGUU.....  
 Bn. sRNA4297517\_59\_149\_3\_10      ..... UAAUCUGCAUCCUGAGGUUA.....  
 Bn. sRNA708190\_0\_2\_0\_0      ..... AAUCUGCAUCCUGAGGUUA.....

AGGACCGGG                    UUU-            UGA   U-            AC---|    C  
                   UAAUCUGCAUCCUGAGG    AAAGCU   UUA   ACGCAUA        AUGC G  
                   AUUAGGCGUAGGGCUCC    UUUCGA   GAU   UGUGUAU        UACG A  
 -----                    UGAU            UAA    UU            CAAUA ^    C

miRNA:      Bn. sRNA4297517\_59\_149\_3\_10

Bna-miR2111c

Bna-miR2111c\_CU695310\_-\_123784\_123920      UAUUGGAGGACCGGGUAAUCUGCAUCCUGGGUUUAAGGUUAAGUACACGCAAAAAUUGCGUACGCAUUAUUUGUGUGUUAGUAAGCUUUAGACCUAGGAUGCGGAUUAACCUUCCUACAUAUCG  
 Bn. sRNA4297521\_2\_4\_3\_3      ..... UAAUCUGCAUCCUGGGUUUA.....  
 Bn. sRNA5244540\_0\_1\_0\_0      ..... UUAGACCUAGGAUGCGGAUUAAC.....  
 Bn. sRNA3379999\_0\_0\_0\_3      ..... GACCUCAGGAUGCGGAUUAAC.....

UAUUG-            CC                                    -      ----|    G            A            G  
                   GUGAGGA   GGUAAUCUGCAUCCUGGGUUU   AAGGU        UAAA   UACACGCAAA   AUAUGC   U  
                   CAUCCU    UCCAUUAGGCGUAGGACUCCAGA   UUUCG        GAUU   GUGUGUUU   UAUACG   A  
 GCAUAA            UC                                    U      AUAU ^      -            A            C

miRNA:      Bn. sRNA4297521\_2\_4\_3\_3

miRNA\*:      Bn. sRNA3379999\_0\_0\_0\_3

#####  
 #####

Bna-miR6028

Bna-miR6028\_AC232470\_+\_113181\_113311      ACAAGCACGGUUGGGAUGAGGAGUAAGGACAUUCAGAUUCGGAAGCUUUGGUCCGUAACUUUAAAAUGGAUUGGUGUUUGAGUUUGUAGCUUUAUCUUCUCAAACUAGCCUC  
 Bn. sRNA3584771\_0\_1\_0\_0      ..... GAUGGAGAGUAAGGACAUUCAG.....  
 Bn. sRNA2143830\_32\_20\_78\_49      ..... AUGGAGAGUAAGGACAUUCAGA.....  
 Bn. sRNA5033878\_47\_16\_52\_27      ..... UGGAGAGUAAGGACAUUCAGA.....  
 Bn. sRNA5033880\_2\_3\_3\_5      ..... UGGAGAGUAAGGACAUUCAGAU.....  
 Bn. sRNA5033882\_0\_1\_3\_2      ..... UGGAGAGUAAGGACAUUCAGAU.....  
 Bn. sRNA3805740\_1\_1\_0\_0      ..... GGAGAGUAAGGACAUUCAGA.....  
 Bn. sRNA3101686\_0\_0\_3\_3      ..... CUGAUGUCUUUCUUCUUAUC.....  
 Bn. sRNA4867445\_0\_1\_0\_0      ..... UGAAGUCUUUCUUCUUA.....  
 Bn. sRNA4867446\_2\_3\_14\_22      ..... UGAAGUCUUUCUUCUUAUC.....

ACAAGCAC|    UGGGA                    U                    A    U    G            UGGU    UAA    UUU  
                   GGU            UGAUGGAGAG   AAGGACAUUCAG   UC   GC   AAGCUUA        CCCG    CU    A  
                   CCG            ACUACUUCUC   UUUCUGUAAGUC   AG   UG   UUUGAGU        GGGU    GG    A  
 CU----- ^    UCAAA                    -                    C    U    -            UUGU    UA-    UAA

miRNA:      Bn. sRNA5033878\_47\_16\_52\_27

miRNA\*:      Bn. sRNA4867446\_2\_3\_14\_22

#####  
#####

Bna-miR6029

```
Bna-miR6029_AC189547_-50957_51072      AAGAGAUACACAAGCCAAGCCUCAAUAAACAAUCCCAACAGAUUACAAUCAAUUUGGCCUUGAAUUUCAUUUGUAAUUAUUGUGGGUUGUGAUUUCAGGCUUGGCUUGUGUAUCU
Bn. sRNA5440353_20_8_14_3                ..... UUGGGUUGUGAUUUCAGGC. ....
Bn. sRNA5440355_6_1_0_0                  ..... UUGGGUUGUGAUUUCAGGCU. ....
Bn. sRNA5440356_0_1_0_0                  ..... UUGGGUUGUGAUUUCAGGCU. ....
Bn. sRNA5440357_0_1_0_0                  ..... UUGGGUUGUGAUUUCAGGCUUGG. ....
Bn. sRNA5088766_2_2_0_2                  ..... UGGGUUGUGAUUUCAGGC. ....
Bn. sRNA5088767_11_9_9_2                  ..... UGGGUUGUGAUUUCAGGCU. ....
Bn. sRNA5088770_444_200_89_69            ..... UGGGUUGUGAUUUCAGGCU. ....
Bn. sRNA5088773_1_0_0_0                  ..... UGGGUUGUGAUUUCAGGCUUG. ....
Bn. sRNA5088774_49_38_14_10              ..... UGGGUUGUGAUUUCAGGCUUGG. ....
Bn. sRNA5088776_3_2_0_0                  ..... UGGGUUGUGAUUUCAGGCUUGGCU. ....
Bn. sRNA5088777_0_1_0_0                  ..... UGGGUUGUGAUUUCAGGCUUGGCU. ....
Bn. sRNA3910413_2_0_0_0                  ..... GGGUUGUGAUUUCAGGCU. ....
Bn. sRNA3910414_22_10_0_0                ..... GGGUUGUGAUUUCAGGCU. ....
Bn. sRNA3910416_3_1_0_0                  ..... GGGUUGUGAUUUCAGGCUUGG. ....
Bn. sRNA3970643_0_1_0_0                  ..... GGUUGUGAUUUCAGGCUUGG. ....
Bn. sRNA5463124_3_2_0_0                  ..... UUGAUUUCAGGCUUGGCU. ....
Bn. sRNA5463125_2_0_0_0                  ..... UUGAUUUCAGGCUUGGCU. ....
Bn. sRNA5161256_0_0_0_2                  ..... UGUAUUCAGGCU. ....
```

```
AAG          C  AA          G      C--|  GG
AGAUACACAAGCCAAGCCU AAAU ACAUCCCAACA AUUACAAU AUUU C
UCUAUGUGUUCGGUUCGGA UUAU UGUUGGGUUGU UAAUGUUA UAAG C
---          C  G-          A      CUU^  UU
```

miRNA: Bn. sRNA5088770\_444\_200\_89\_69

#####  
#####

Bna-miR6030

```
Bna-miR6030_AC189357_-62458_62570      UCAGGGAUUAAGUGUCUGUAUGUGUGGGCUGAGUAGGCACAAUCACAGCUUUUACUCAGAUUGGUUGUGAAUGGACCUUCCACCCAUACCAUACAGACCCUUAUCCUGA
Bn. sRNA624126_0_0_3_0                  ..... AAGUGUCUGUAUGUGGGCUG. ....
Bn. sRNA2204939_0_0_3_0                  ..... AUGUGGGCUGAGUAGGCAC. ....
Bn. sRNA5176181_1_0_0_0                  ..... UGUGGGCUGAGUAGGCACAAUC. ....
Bn. sRNA5347973_1_2_0_0                  ..... UUCUCCACCAUACCAUACAGACCC. ....
Bn. sRNA4615475_100_90_55_44            ..... UCCACCAUACCAUACAGACCC. ....
Bn. sRNA2687439_0_1_3_0                  ..... CCACCAUACCAUACAGACCC. ....
Bn. sRNA2687441_0_1_0_2                  ..... CCACCAUACCAUACAGACCCU. ....
Bn. sRNA2485711_3_6_0_0                  ..... CACCAUACCAUACAGACCC. ....
Bn. sRNA931977_0_0_3_0                  ..... ACCCAUACCAUACAGACCC. ....
Bn. sRNA2705012_0_1_0_0                  ..... CCAUACCAUACAGACCCU. ....
```

```
UCA          U      -|  CU  U  CA  A      UUUACU
GGGAUUAAG GUCUGUAU GUGUGGG GAG AGG CA UCACAGCU \
UCCUAUUC CAGACUA CAUACCC CUC UCC GU AGUGUUG C
AG-          C      C^  AC  U  AG  A      UCUAGA
```

miRNA: Bn. sRNA4615475\_100\_90\_55\_44

miRNA\*: Bn. sRNA624126\_0\_0\_3\_0

#####  
#####  
Bna-miR6031

Bna-miR6031\_AC189275\_-\_4339\_4409      UAAGAGGUUCGGAGCGGUUUGAAGCGAUUUUAAGCGGCUUGUAUGAUUGUUUCGAAACGCUGUCAACCGCU  
Bn. sRNA4273540\_1\_3\_0\_0      UAAGAGGUUCGGAGCGGUUGAA.....  
Bn. sRNA4273541\_3\_5\_3\_0      UAAGAGGUUCGGAGCGGUUGAAG.....  
Bn. sRNA480176\_0\_0\_0\_2      .AAGAGGUUCGGAGCG.....  
Bn. sRNA480185\_0\_1\_0\_0      .AAGAGGUUCGGAGCGGUU.....  
Bn. sRNA480187\_4\_1\_0\_0      .AAGAGGUUCGGAGCGGUUGA.....  
Bn. sRNA480188\_0\_1\_0\_2      .AAGAGGUUCGGAGCGGUUGAA.....  
Bn. sRNA480190\_0\_1\_0\_0      .AAGAGGUUCGGAGCGGUUGAAG.....  
Bn. sRNA480192\_40\_34\_11\_17      .AAGAGGUUCGGAGCGGUUGAAGC.....  
Bn. sRNA1306489\_0\_0\_3\_0      ..AGAGGUUCGGAGCGGUUGA.....  
Bn. sRNA1306490\_2\_2\_0\_0      ..AGAGGUUCGGAGCGGUUGAA.....  
Bn. sRNA1306494\_1\_0\_0\_0      ..AGAGGUUCGGAGCGGUUGAAG.....  
Bn. sRNA1306496\_1\_2\_3\_0      ..AGAGGUUCGGAGCGGUUGAAGC.....  
Bn. sRNA1306500\_8\_8\_3\_2      ..AGAGGUUCGGAGCGGUUGAAGCG.....  
Bn. sRNA3506998\_0\_1\_0\_0      ...GAGGUUCGGAGCGGUUGAAGC.....  
Bn. sRNA3507003\_2\_0\_0\_0      ...GAGGUUCGGAGCGGUUGAAGCG.....  
Bn. sRNA3507004\_0\_1\_0\_0      ...GAGGUUCGGAGCGGUUGAAGCGA.....  
Bn. sRNA1619213\_0\_1\_0\_0      ....AGGUUCGGAGCGGUUGAAGC.....  
Bn. sRNA1619216\_0\_1\_0\_0      ....AGGUUCGGAGCGGUUGAAGCGA.....  
Bn. sRNA1619217\_3\_0\_0\_0      ....AGGUUCGGAGCGGUUGAAGCGAU.....  
Bn. sRNA3965242\_0\_0\_3\_0      .....GGUUCGGAGCGGUUGAAGC.....  
Bn. sRNA4169600\_0\_0\_0\_2      .....GUUCGGAGCGGUUGAAGC.....  
Bn. sRNA4169602\_1\_0\_0\_2      .....GUUCGGAGCGGUUGAAGCG.....  
Bn. sRNA5333702\_0\_1\_0\_0      .....UUCGGAGCGGUUGAAGCG.....  
Bn. sRNA4696485\_1\_3\_0\_0      .....UCGGAGCGGUUGAAGCGAUUUA.....  
Bn. sRNA4696487\_1\_1\_0\_2      .....UCGGAGCGGUUGAAGCGAUUUU.....  
Bn. sRNA4482950\_0\_1\_0\_0      .....UAUGAUUGUUUCGAAACGC.....  
Bn. sRNA2102982\_0\_1\_0\_0      .....AUGAUUGUUUCGAAACGCUGUCA.....  
Bn. sRNA2102983\_0\_0\_3\_0      .....AUGAUUGUUUCGAAACGCUGUCA.....  
Bn. sRNA4948844\_0\_0\_0\_3      .....UGAUUGUUUCGAAACGCUGUCAAC.....  
Bn. sRNA5197031\_0\_0\_0\_2      .....UGUUUCGAAACGCUGUCAACCGCU

UA A C - G -| C  
AG GGUU GG AGCG UUUGAAGCGAUU UAUAG G  
UC CCAA CU UCGC AAGCUUUGUAG AUGUU G  
-- G - G A U^ C

miRNA: Bn. sRNA480192\_40\_34\_11\_17  
miRNA\*: Bn. sRNA5197031\_0\_0\_0\_2

#####  
#####

Bna-miR6032

Bna-miR6032\_AC189188\_+\_93308\_93437      UUAUUUUGUUUUAACAUGGAGCAUCAACAGAUUCUGGAGCAUGUAAGAUUCUGUUGUUCUCCGGGAUCUGCUGGUCGUUCCAUGUUAACUAAUAA  
Bn. sRNA5209737\_0\_0\_0\_3      .....UUAACAUGGAGCAUCAACAGA.....  
Bn. sRNA4255823\_0\_0\_0\_3      .....UAACAUGGAGCAUCAACAGAU.....  
Bn. sRNA326079\_0\_0\_0\_2      .....AACAUGGAGCAUCAACAGAU.....  
Bn. sRNA896639\_0\_0\_3\_0      .....ACAUGGAGCAUCAACAGAU.....  
Bn. sRNA2144965\_0\_0\_0\_3      .....AUGGAGCAUCAACAGAUUCUGGAG.....  
Bn. sRNA5036147\_6\_3\_14\_3      .....UGGAGCAUCAACAGAUUCUGG.....  
Bn. sRNA3809545\_1\_0\_0\_0      .....GGAGCAUCAACAGAUUCUGG.....  
Bn. sRNA3462653\_1\_0\_0\_0      .....GAGCAUCAACAGAUUCUGGAG.....  
Bn. sRNA2937490\_0\_0\_0\_2      .....CGGGGAUCUGCUGGUCGUUCCA.....  
Bn. sRNA4780944\_0\_0\_3\_2      .....UCUGCUGGUCGUUCCAUGUUA.....

U U - A G -- UG GA  
UUAUUU GUUU AACAUGGAG CAUCAACAGAUUC GAG CA UAA U  
AAUAAA CAAA UUGUACCUUG UGGU GUCUAGGG CUC GU GUU C  
U - C C G CU UU GU

miRNA: Bn. sRNA5036147\_6\_3\_14\_3  
miRNA\*: Bn. sRNA2937490\_0\_0\_0\_2

#####  
#####

Bna-miR6033

Bna-miR6033\_AC137927+\_57666\_57775 GAGGAUUCUCUCAAGUCCACUCGGUGUGGUUCUUAGGAACGAACCCUCUAACUGUACAGUAGGUGACGUCCUAUGAACAGAUAGAGUGGACUUGAGAGAUGGGU  
 Bn. sRNA2691412\_1\_0\_0\_0 ..... CCACUCGGUGUGGUUCUUAGG.....  
 Bn. sRNA2985054\_0\_1\_0\_0 ..... CGUCCUAUGAACAGAUAGA.....  
 Bn. sRNA4475505\_2\_0\_0\_0 ..... UAUGAACAGAUAGAGUGGG.....  
 Bn. sRNA4841912\_1\_0\_0\_0 ..... UGAACCAGAUAGAGUGGGAC.....  
 Bn. sRNA4841913\_14\_2\_3\_0 ..... UGAACCAGAUAGAGUGGGACU.....  
 Bn. sRNA335898\_0\_0\_3\_0 ..... AACAGAUAGAGUGGGACUUG.....

GAGGAU G G U A-| CUC U  
 UCUCUCAAGUCCACUC GU UGGUUC UAGGAACG ACC UAACUG \  
 AGAGAGUUCAGGGUGAG UA ACCAAG AUCCUUGC UGG AUUGAC U  
 UGGGU- A G U AG^ --- A

miRNA: Bn. sRNA4841913\_14\_2\_3\_0  
 miRNA\*: Bn. sRNA2691412\_1\_0\_0\_0

#####  
 #####

Bna-miR6034

Bna-miR6034\_AC232474\_-3783\_3992 AUAUACUCUCAAGCAUAUCAACCCCGAAGCUAUACACGUCUGAUUUUGCCGACAUUGUAUUAGAAAUUAACAAGUUGGAGACAUUCUGAUUAUAGCUUUGGGUUGAUUAGCUUGAGAGUAU  
 Bn. sRNA1870119\_0\_1\_0\_2 AUAUACUCUCAAGCAUAUCA.....  
 Bn. sRNA1870120\_7\_2\_3\_3 AUAUACUCUCAAGCAUAUCA.....  
 Bn. sRNA1870121\_0\_1\_0\_0 AUAUACUCUCAAGCAUAUCAACC.....  
 Bn. sRNA4448249\_1\_0\_0\_0 .UAUACUCUCAAGCAUAUCAAC.....  
 Bn. sRNA4448250\_1\_0\_0\_0 .UAUACUCUCAAGCAUAUCAACC.....  
 Bn. sRNA4355685\_1\_1\_0\_0 ...UACUCUCAAGCAUAUCAACCC.....  
 Bn. sRNA4355687\_0\_1\_0\_0 ...UACUCUCAAGCAUAUCAACCCCGA.....  
 Bn. sRNA1068068\_1\_0\_0\_0 ....ACUCUCAAGCAUAUCAACCC.....  
 Bn. sRNA340783\_1\_1\_0\_0 .....AACCCCGAAGCUAUACACGUC.....  
 Bn. sRNA340784\_1\_1\_0\_2 .....AACCCCGAAGCUAUACACGUCUGA.....  
 Bn. sRNA2724187\_1\_0\_0\_0 .....CCCCGAGCAUAACACGUCUGA.....  
 Bn. sRNA4774573\_1\_0\_0\_0 .....UCUGAUGUAUAGCU.....  
 Bn. sRNA4774577\_1\_0\_0\_0 .....UCUGAUGUAUAGCUUUGG.....  
 Bn. sRNA4774578\_41\_30\_3\_24 .....UCUGAUGUAUAGCUUUGGG.....  
 Bn. sRNA4774579\_0\_2\_0\_0 .....UCUGAUGUAUAGCUUUGGG.....  
 Bn. sRNA4774580\_4\_1\_0\_0 .....UCUGAUGUAUAGCUUUGGGU.....  
 Bn. sRNA4774581\_21\_4\_0\_3 .....UCUGAUGUAUAGCUUUGGGUU.....  
 Bn. sRNA3114989\_1\_0\_0\_0 .....CUGAUGUAUAGCUUUGGGUU.....  
 Bn. sRNA1841200\_1\_0\_0\_0 .....AUAGCUUUGGGUUGAUAGC.....  
 Bn. sRNA3221418\_0\_0\_3\_0 .....CUUUGGGUUGAUAGCUUGAG.....  
 Bn. sRNA5557453\_0\_0\_3\_0 .....UUUGGGUUGAUAGCUUGAG.....

C U UUG U G  
 AUAUACUCUCAAGCAUAUCAACCCCGAAGCAUA ACGUC GAU UCCGACAUUGUAU A A  
 UUAUAGAGAGUUCGUUAGUUGGGUUCGUAU UGUAG CUA AGGUUGAACAUU A A  
 A U CAG - A

miRNA: Bn. sRNA4774578\_41\_30\_3\_24  
 miRNA\*: Bn. sRNA2724187\_1\_0\_0\_0

#####  
 #####

Bna-miR6035

Bna-miR6035\_AC189440\_-22887\_22977 AAACUGCAAAUUGGAGUAGAAAAUGCAGUCGUGAACAAACUGCAUUUCCACUCCAUUUGUUUGUUUUGACUACAUUUCCACUCCAUUU  
 Bn. sRNA400969\_0\_1\_0\_0 .AACUGCAAAUUGGAGUAGAAAAUG.....  
 Bn. sRNA2146530\_1\_2\_0\_7 .....AUGGAGUAGAAAAUGCAGUCG.....  
 Bn. sRNA5040123\_3\_2\_0\_2 .....UGGAGUAGAAAAUGCAGUCGU.....  
 Bn. sRNA4885464\_0\_1\_0\_0 .....UGACUACAUUUCCACUCCAU.....

AAACUGCA| A C UGCAUUUC  
 AAAUGGAGU GAAAUG AGUCGUGAACAAAC \  
 UUUACCUCA CUUUUAC UCAGUAUUUGUUUG C  
 -----^ C A UUUACCUCA

miRNA: Bn. sRNA5040123\_3\_2\_0\_2  
 miRNA\*: Bn. sRNA4885464\_0\_1\_0\_0

#####  
 #####

Bna-miR6036

```

Bna-miR6036_AC189214_-_37840_37994 UCAGUUAGCCUCAGUGGUUUCUGGGUCUAGUUAUUAUUUUUUUUUAUUGGUAACGGGCGGUUGUGGAAGUGAUGUUAAAAUAAGAAUUCACAAUGAUUGGUUACUAAAUAUAGUACUAGUACUUGCAUGAUGAUUAUGCA
Bn. sRNA1691467_0_0_3_0 ..... AGUGGUUUCUGGGUCUAGUUAU .....
Bn. sRNA5120293_0_0_0_2 ..... UGGUUUCUGGGUCUAGUUAU .....
Bn. sRNA5120294_0_0_0_2 ..... UGGUUUCUGGGUCUAGUUAUUAU .....
Bn. sRNA4270010_0_1_0_0 ..... UAAGAAUUCACAAUGAUUGGU .....
Bn. sRNA1851702_0_0_3_0 ..... AUAGUACUAGUACUUGCAUG .....
Bn. sRNA1851703_0_3_9_7 ..... AUAGUACUAGUACUUGCAUGAUC .....
Bn. sRNA4426516_0_0_0_2 ..... UAGUACUAGUACUUGCAUGAUC .....
Bn. sRNA4426517_1_1_3_2 ..... UAGUACUAGUACUUGCAUGAUC .....
Bn. sRNA1635639_0_0_0_2 ..... AGUACUAGUACUUGCAUGAUC .....
Bn. sRNA1635640_0_1_0_0 ..... AGUACUAGUACUUGCAUGAUC .....
Bn. sRNA4000212_0_2_0_0 ..... GUACUAGUACUUGCAUGAUC .....

```

```

UCAGUUA  CUCA--  UCU  -|  A  UUAUUUUUA  -  G  CG  UG  AGUG-  GUU
      GC  GUGGUU  CGGGU  CUAGUUAU  UUAUUU  UGGUA  AC  GG  GU  UUGUGGA  AU  \
      CG  UACUAG  GUUCA  GAUCAUG  AUAUAA  AUCAU  UG  UU  UA  AACACUU  UA  U
A-----  UAU AUG  UAC  U^  -  -----  A  G  AG  GU  AAGAA  AAA

```

miRNA: Bn. sRNA1851703\_0\_3\_9\_7  
miRNA\*: Bn. sRNA5120294\_0\_0\_0\_2

```

#####
#####

```

Bna-miR408\*

```

Bna-miR408*_AC190050+_184548_184568 CAAGCAAGCUUUUCUUUAUCUGUUUUACAAUGAAAUGAAGAAGACAAAAGUGGUAAUCAGAGAGAGACAGGGAACAAGCAGAGCAUGGAUUG
Bn. sRNA1264291_1_0_0_0 ..... AGAGAGAGACAGGGAACAAGC .....
Bn. sRNA1255329_1_2_0_0 ..... AGAGACAGGGAACAAGCAGAGCA .....
Bn. sRNA3429526_0_0_0_2 ..... GAGACAGGGAACAAGCAGAGCA .....
Bn. sRNA3429527_11_16_0_7 ..... GAGACAGGGAACAAGCAGAGCAUG .....
Bn. sRNA1213684_1_0_0_0 ..... AGACAGGGAACAAGCAGAGCA .....
Bn. sRNA1213685_2_3_0_0 ..... AGACAGGGAACAAGCAGAGCAUG .....
Bn. sRNA3368267_2_0_0_0 ..... GACAGGGAACAAGCAGAGCAUG .....
Bn. sRNA872291_1_1_0_0 ..... ACAGGGAACAAGCAG .....
Bn. sRNA872297_0_0_0_2 ..... ACAGGGAACAAGCAGAGC .....
Bn. sRNA872298_9_7_6_2 ..... ACAGGGAACAAGCAGAGCA .....
Bn. sRNA872303_2_5_6_3 ..... ACAGGGAACAAGCAGAGCAU .....
Bn. sRNA872306_2963_4623_1697_2863 ..... ACAGGGAACAAGCAGAGCAUG .....
Bn. sRNA872312_2_5_3_5 ..... ACAGGGAACAAGCAGAGCAUGG .....
Bn. sRNA2570861_0_1_0_0 ..... CAGGGAACAAGCAGAGCA .....
Bn. sRNA2570863_60_99_0_0 ..... CAGGGAACAAGCAGAGCAUG .....
Bn. sRNA2570864_14_39_14_19 ..... CAGGGAACAAGCAGAGCAUGG .....
Bn. sRNA2570865_2_3_0_5 ..... CAGGGAACAAGCAGAGCAUGGA .....
Bn. sRNA1554926_0_1_0_0 ..... AGGGAACAAGCAGAGCA .....
Bn. sRNA1554938_9_12_0_5 ..... AGGGAACAAGCAGAGCAUG .....
Bn. sRNA1554939_1_0_0_0 ..... AGGGAACAAGCAGAGCAUGGAUUG .....
Bn. sRNA3865561_1_1_0_0 ..... GGAACAAGCAGAGCAUG .....

```

```

G-  A  U  UAA-|  ACAA  AAUGAAGAAGA
CAA  CA  GCUUU  CUU  UCUGUUUU  UGA  \
GUU  GU  CGAGA  GAA  GGACAGAG  ACU  C
      AG  A  C  CAAG^  AGAG  AAUGGUGAAAA

```

miRNA\*: Bn. sRNA872306\_2963\_4623\_1697\_2863

**A**

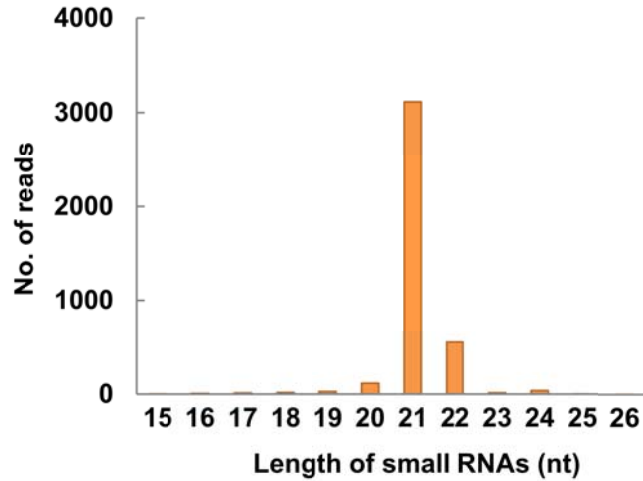

**B**

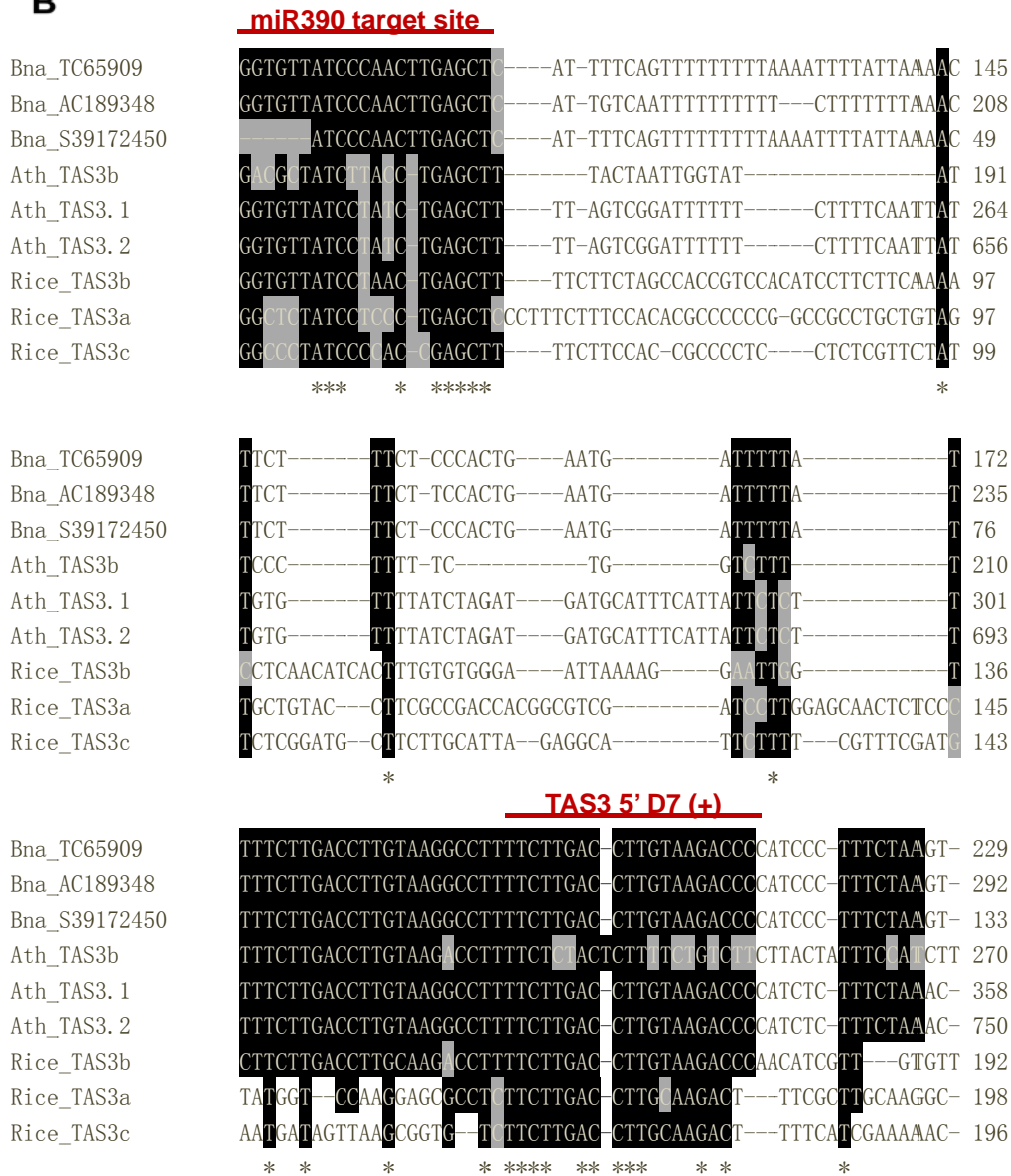

```

Bna_TC65909      ----GTCTCCTTCTTCTATC-ATTTTACAGATT--TTCTTTTATCT-TTT--TTGGTGT 278
Bna_AC189348    ----GTCTCCTTCTTCTATC-ATTTTACAGATT--TTCTTTTATCTCTTT--TTGGTGT 342
Bna_S39172450   ----GTCTCCTTCTTCTATC-ATTTTACAGATT--TTCTTTTATCT-TTT--TTGGTGT 182
Ath_TAS3b       CGAGATTTCTCAATTCTGTCGATTTTAAATTAGTTTATATGAGTAAATCGAT-C 329
Ath_TAS3.1     ----GTTTTATTATTCTTC-GTTTTACAGATT--CTTTTATCTCTTC--TCAATAT 408
Ath_TAS3.2     ----GTTTTATTATTCTTC-GTTTTACAGATT--CTTTTATCTCTTC--TCAATAT 800
Rice_TAS3b     ----GTTTTCTTCTTCTT-ATTTTCAATT--TCCTCACTCTTC--TTTCT-- 238
Rice_TAS3a     ----GCTTCCCTGCA-----TATTGTCCTGCGA--TTC--TC----- 228
Rice_TAS3c     ----ACTCTTCTCACTTTT-----CTCGTATATCCTTGCCAACATTTC--TC----- 239

```

\* \* \* \*

**miR390**

```

Bna_TC65909      AAGATATGTATGTATATCT ACCCCTAGTTTGTCTGAGTCATCTTCTC-CTACCTTGCT 336
Bna_AC189348    AAGATATGTATGTATATCT ACCCCTAGTTTGTCTGAGTCATCTTCTC-CTACCTTGCT 400
Bna_S39172450   AAGATATGTATGTATATCT ACCCCTAGTTTGTCTGAGTCATCTTCTC-CTACCTTGCT 240
Ath_TAS3b       AAGATTT--TGT TTTT ACCTTA-----TGA TCATATCCCCTCTTT TGT 377
Ath_TAS3.1     AGATAGATAT TAT TCT ACCCTAATTCGTCGAGTCATTTTCTC-CTACCTTGCT 466
Ath_TAS3.2     AGATAGATAT TAT TCT ACCCTAATTCGTCGAGTCATTTTCTC-CTACCTTGCT 858
Rice_TAS3b     --A ACT--CCCATTTT--CTCCTAGTTC-----TTGCCTTCTC--TCCTGCT 280
Rice_TAS3a     --ATC-----TTTACACCCCT-----CT-CCTCTGCCATTTCTGCT 265
Rice_TAS3c     --GTCCTCTCGCTTATCACCT-----CCCATCTTCTT-TGTCCGCT 284

```

\* \* \* \*

\*

\* \*

**target site**

```

Bna_TC65909      ATCCCTCCTGAGCTA-GTCCTTGCATCTTTTGTAGTCCAT--TGATGTA----- 384
Bna_AC189348    ATCCCTCCTGAGCTA-GTCCTTGTATCTTTTGTAGTCCAT--TGAT TAAATTTCAA 457
Bna_S39172450   ATCCCTCCTGAGCTA-GTCCTTGCATCTTTTGTAGTCCAT--TGATGTATGGTTGATA 297
Ath_TAS3b       ATCCCTC TGAGCTG-CCTAATTTTCTTCTTAATCTCTTACTTT----- 427
Ath_TAS3.1     ATCCCTCCTGAGCTA-ATCTCCACATATATCTTTTGTATTGATGTA----- 516
Ath_TAS3.2     ATCCCTCCTGAGCTA-ATCTCCACATATATCTTTTGTATTGATGTA----- 908
Rice_TAS3b     ATCCCTCCTGAGCTGTATTGATCACTTTCTATGTTATTTCT--CGATGT----- 328
Rice_TAS3a     ATCCCTCCTGAGCT-----T-----TG TG-----GTTCCG----- 290
Rice_TAS3c     ATCCCTC TGAGCT-----TGTGACTTGTGTGCTAAGGTACTTTA----- 324

```

\*\*\*\*\* \*\*\*\*\*

\*

\*

\*

**Supplemental Figure S6.** Size distribution of *B.napus* ta-siRNAs and the sequence conservations of *B.napus* TAS3 genes. A, Size distribution of ta-siRNAs generated from the TC65909 gene. B, Multiple alignment of *B.napus* TAS3 genes with *Arabidopsis thaliana* and Rice TAS3 genes. Bna, *B.napus*; Ath, *Arabidopsis thaliana*.



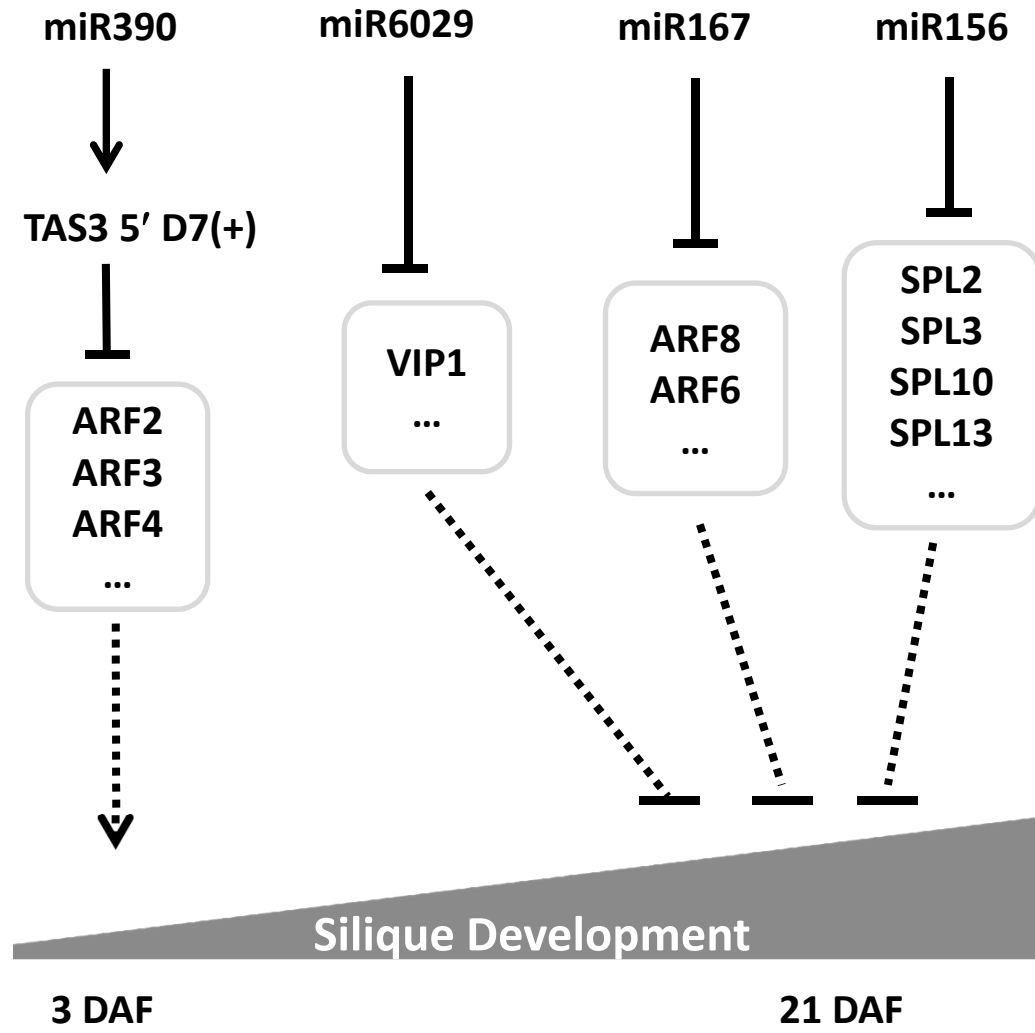

**Supplemental Figure S7.** A proposed model of the regulation of *B.napus* early silique development via miRNAs, ta-siRNA, and their target genes.
